# Supplementary material for: Determinants of Exposure Therapy Implementation in Clinical Practice for the Treatment of Anxiety, OCD, and PTSD: A Systematic Review
Source: Springer Nature journal article supplement (doi:10.1007/s10567-024-00478-3), 2024-04-17
Supplement: MOESM2 [file 26991576]

## Online Resource 2

### Details of Included Studies

**Table 1**

*Details of Included Studies*

| Study                        | Design                   | Method | Country       | Participants                                                                                                           | Presentation                                          | Developmental Subgroup | Therapy                    | Aim                                                                                                                                    | Sample Details                                                                                                                                                                        |
|------------------------------|--------------------------|--------|---------------|------------------------------------------------------------------------------------------------------------------------|-------------------------------------------------------|------------------------|----------------------------|----------------------------------------------------------------------------------------------------------------------------------------|---------------------------------------------------------------------------------------------------------------------------------------------------------------------------------------|
| (C. B. Becker et al., 2004)  | Quantitative descriptive | Survey | United States | 207 psychologists and 29 members of a trauma special interest group                                                    | PTSD                                                  | Lifespan (unspecified) | Imaginal exposure          | To assess licensed psychologists use of imaginal exposure for PTSD and investigate the perceived barriers to its implementation.       | Unknown age and gender. 100% psychologists.                                                                                                                                           |
| (S. Becker et al., 2018)     | Quantitative descriptive | Survey | Germany       | 209 trainee and licensed cognitive-behavioural therapists with experiencing treating panic disorder and/or agoraphobia | Anxiety disorders (panic disorder and/or agoraphobia) | Lifespan (unspecified) | Exposure therapy (general) | To determine the psychometric properties of a German version of the TBES and obtain preliminary indications of its construct validity. | $M_{age} = 35$ years ( $SD = 8$ ). 82% female. 96% studied psychology at university, 2% pedagogy, 1% medicine, 1% social pedagogy, 1% teaching, and 1% political and social sciences. |
| (Becker-Haimes et al., 2020) | Quantitative descriptive | Survey | United States | 24 leaders of specialty anxiety clinics and 19 community clinicians                                                    | Anxiety-related presentations (unspecified)           | Lifespan (unspecified) | Exposure therapy (general) | To identify the innovation-specific organisational capacity necessary to deliver exposure therapy.                                     | Clinic leaders: $M_{age} = 48$ years (range 32 – 69), 50% female, and 75% clinical psychologists. Community clinicians: $M_{age} = 43$ , 79% female.                                  |

| Study                                  | Design                   | Method     | Country       | Participants                                                                                    | Presentation                                                              | Developmental Subgroup | Therapy                                                       | Aim                                                                                                                                            | Sample Details                                                                                             |
|----------------------------------------|--------------------------|------------|---------------|-------------------------------------------------------------------------------------------------|---------------------------------------------------------------------------|------------------------|---------------------------------------------------------------|------------------------------------------------------------------------------------------------------------------------------------------------|------------------------------------------------------------------------------------------------------------|
| (Becker-Haimes et al., 2017)           | Quantitative descriptive | Survey     | United States | 335 community mental health clinicians                                                          | Anxiety-related presentations (combined anxiety disorders, OCD, and PTSD) | Youth (unspecified)    | Exposure therapy (general)                                    | To characterise clinician and organisational predictors of exposure use and relaxation for anxiety.                                            | Unknown occupations.<br><br>$M_{age} = 39$ years ( $SD = 12$ ). 78% female. Unknown occupations.           |
| (Chen et al., 2022)                    | Quantitative descriptive | Survey     | Australia     | 60 registered psychologists                                                                     | Anxiety-related presentations (unspecified)                               | Adults (unspecified)   | Exposure, cognitive, anxiety management, and other techniques | To examine the use of exposure therapy compared to other treatment techniques among clinicians who treat older adults with anxiety disorders.  | $M_{age} = 44$ ( $SD = 14$ ). 83% female.                                                                  |
| (Cook, Dinnen, Coyne, et al., 2015)    | Mixed methods            | Sequential | United States | 198 mental health providers from Department of Veterans Affairs' residential treatment programs | PTSD                                                                      | Adults (unspecified)   | Prolonged exposure and cognitive processing therapy           | To evaluate factors influencing provider use of two evidence-based treatments for PTSD.                                                        | Unknown age. 64% female. 56% psychologists, 33% social workers, 6% nurses, 3% psychiatrists, and 3% other. |
| (Cook, Dinnen, Thompson, et al., 2015) | Quantitative descriptive | Survey     | United States | 201 PTSD treatment providers in Veterans Affairs residential treatment settings                 | PTSD                                                                      | Adults (unspecified)   | Prolonged exposure and cognitive processing therapy           | To examine the implementation of two evidence-based psychotherapies, Prolonged Exposure and Cognitive Processing Therapy, in the Department of | Unknown age and gender. 51% doctoral-level psychologists.                                                  |

| Study                         | Design        | Method      | Country       | Participants                                                                                                               | Presentation | Developmental Subgroup | Therapy                                             | Aim                                                                                                                                                                                                                                                         | Sample Details                                                                                                    |
|-------------------------------|---------------|-------------|---------------|----------------------------------------------------------------------------------------------------------------------------|--------------|------------------------|-----------------------------------------------------|-------------------------------------------------------------------------------------------------------------------------------------------------------------------------------------------------------------------------------------------------------------|-------------------------------------------------------------------------------------------------------------------|
| (Cook et al., 2014)           | Mixed methods | Convergence | United States | 190 Veterans Affairs residential PTSD treatment program providers                                                          | PTSD         | Adults (unspecified)   | Prolonged exposure and cognitive processing therapy | Veterans Affairs residential PTSD treatment programs.<br>To determine the status of training, implementation of prolonged exposure and cognitive processing therapy, and its predictors in VA residential PTSD treatment programs.                          | $M_{age} = 46$ ( $SD = 11$ ). 60% female. 63% psychologists, 31% social workers, 4% nurses, and 3% psychiatrists. |
| (Cook et al., 2013)           | Mixed methods | Sequential  | United States | 267 directors, providers (sub-sample of 179), and staff members from 38 sites in the Veteran's Integrated Service Networks | PTSD         | Adults (unspecified)   | Prolonged exposure and cognitive processing therapy | To report on the initial adoption of prolonged exposure and cognitive processing therapy in these settings during the initial stages of the system-wide national Veterans Affairs dissemination initiative to train providers in these treatments for PTSD. | Unknown age and gender. 41% psychologists, 21% social workers, 14% nurses, 7% psychiatrists, and 17% other.       |
| (Cook, Simiola, et al., 2020) | Mixed methods | Sequential  | United States | 526 providers from 39 Veteran Affairs residential PTSD treatment programs                                                  | PTSD         | Adults (unspecified)   | Prolonged exposure and cognitive processing therapy | To examine the patterns of adoption of prolonged exposure and cognitive processing therapy                                                                                                                                                                  | Unknown age and gender. The most frequent profession (of unknown proportion) was psychologist,                    |

| Study                             | Design                   | Method | Country       | Participants                                                                   | Presentation | Developmental Subgroup | Therapy                                             | Aim                                                                                                                                                                                                                                                                                                 | Sample Details                                                                                                                                                                                               |
|-----------------------------------|--------------------------|--------|---------------|--------------------------------------------------------------------------------|--------------|------------------------|-----------------------------------------------------|-----------------------------------------------------------------------------------------------------------------------------------------------------------------------------------------------------------------------------------------------------------------------------------------------------|--------------------------------------------------------------------------------------------------------------------------------------------------------------------------------------------------------------|
| (Cook, Thompson, & Schnurr, 2015) | Quantitative descriptive | Survey | United States | 215 Department of Veterans Affairs residential treatment providers             | PTSD         | Adults (unspecified)   | Prolonged exposure and cognitive processing therapy | in Department of Veterans Affairs residential PTSD treatment programs.<br><br>To examine the psychometric properties and factor structure of the Perceived Characteristics of Intervention Scale (PCIS), developed to capture provider perceptions of a particular mental health care intervention. | followed by social worker, nurse, and other (e.g., psychiatrist, chaplain).<br><br>$M_{age} = 45$ ( $SD = 11$ ). 62% female. 52% psychologists, 30% social workers, and 19% psychiatrists, nurses, or other. |
| (Cook, Thompson, et al., 2020)    | Quantitative descriptive | Survey | United States | 159 providers from 38 Department of Veterans Affairs residential PTSD programs | PTSD         | Adults (unspecified)   | Prolonged exposure and cognitive processing therapy | To examine the role of attitudes toward evidence-based psychotherapies in predicting use of prolonged exposure and cognitive processing therapy for PTSD among treatment providers within the Department of Veterans Affairs.                                                                       | Unknown age and gender. 44% psychologists, 38% social workers, 8% psychiatrists, and 11% other.                                                                                                              |

| Study                              | Design                      | Method            | Country                 | Participants                                                    | Presentation                                | Developmental Subgroup | Therapy                                             | Aim                                                                                                                                                                            | Sample Details                                                                                                                                                                                                           |
|------------------------------------|-----------------------------|-------------------|-------------------------|-----------------------------------------------------------------|---------------------------------------------|------------------------|-----------------------------------------------------|--------------------------------------------------------------------------------------------------------------------------------------------------------------------------------|--------------------------------------------------------------------------------------------------------------------------------------------------------------------------------------------------------------------------|
| (Deacon et al., 2013) <sup>a</sup> | Quantitative non-randomised | Repeated measures | United States           | 162 therapists                                                  | Anxiety-related presentations (unspecified) | Lifespan (unspecified) | Exposure therapy (general)                          | To examine the reliability and validity of the Therapist Beliefs about Exposure Scale (TBES) in three samples of practicing clinicians.                                        | $M_{age} = 51$ ( $SD = 13$ ). 76% female. Trainers reported most attendees were masters-level providers in the fields of social work or counselling.                                                                     |
| (de Jong et al., 2020)             | Quantitative descriptive    | Survey            | Netherlands and Belgium | 207 youth mental health care professionals                      | Anxiety-related presentations (unspecified) | Youth (unspecified)    | Exposure therapy (general)                          | To examine what therapist characteristics may be involved in the (non-)use of exposure in treating childhood anxiety disorders.                                                | Most common age range was 30 to 39 years old (38%). 93% female. 34% health care psychologist, 29% psychologist without specialization, 13% social worker not specialized, all other professions less than 13%.           |
| (Finley et al., 2015)              | Quantitative descriptive    | Survey            | United States           | 128 non-prescribing providers from Veteran Affairs PTSD clinics | PTSD                                        | Adults (unspecified)   | Prolonged exposure and cognitive processing therapy | To describe the utilisation of prolonged exposure and cognitive processing therapy and to identify individual and organisational factors associated with uptake and adherence. | $M_{age} = 44$ ( $SD = 11$ ). 70% female. 54% doctorate in clinical psychology, 33% masters in social work with advanced clinical certification, 12% doctorate in counselling psychology, and 2% masters in social work. |

| Study                 | Design                                   | Method | Country       | Participants                                                                                                                                                         | Presentation                                | Developmental Subgroup | Therapy                                                                | Aim                                                                                                                                                                                           | Sample Details                                                                                                                                                                       |
|-----------------------|------------------------------------------|--------|---------------|----------------------------------------------------------------------------------------------------------------------------------------------------------------------|---------------------------------------------|------------------------|------------------------------------------------------------------------|-----------------------------------------------------------------------------------------------------------------------------------------------------------------------------------------------|--------------------------------------------------------------------------------------------------------------------------------------------------------------------------------------|
| (Foa et al., 2020)    | Quantitative randomised controlled trial | -      | United States | 242 clients (active military personnel with PTSD symptoms) and 103 active duty or civilian behavioral health providers at three US Army medical treatment facilities | PTSD                                        | Adults (unspecified)   | Prolonged exposure                                                     | To determine the utility of an implementation strategy and to assess clinical outcomes associated with the strategy.                                                                          | Clients:<br>Unknown age.<br>84% male.<br>Providers:<br>Unknown age.<br>63% female. 61% social workers, 34% psychologists, 1% mental health counsellors, and 4% other.                |
| (Garcia et al., 2020) | Quantitative descriptive                 | Survey | United States | 227 psychologists and social workers working with a PTSD clinical team at the Veterans Health Administration                                                         | PTSD                                        | Adults (unspecified)   | Cognitive processing therapy, prolonged exposure, and other techniques | To describe use of CPT, PE, and "other" psychotherapies among Veterans Health Administration PTSD specialty care providers, and examine factors associated with providers' use of treatments. | The largest age group (37%) was 30-39 years. 69% female. 67% psychologists and 33% social workers.                                                                                   |
| (Harned et al., 2013) | Quantitative randomised controlled trial | -      | United States | 181 therapists naive to exposure therapy                                                                                                                             | Anxiety-related presentations (unspecified) | Lifespan (unspecified) | Exposure therapy (general)                                             | To examine organisational, client, and therapist characteristics as predictors of use of and proficiency in exposure therapy after training.                                                  | $M_{age} = 37$ ( $SD = 10$ ). 71% female. 29% masters level counsellors, 28% social workers, 23% student trainee, 14% psychologists, 4% psychiatrists, 2% psychiatric nurses, and 2% |

| Study                 | Design                                   | Method            | Country                          | Participants                                                                                                            | Presentation                                                        | Developmental Subgroup | Therapy                                          | Aim                                                                                                                       | Sample Details                                                                                                                                                                                                                                        |
|-----------------------|------------------------------------------|-------------------|----------------------------------|-------------------------------------------------------------------------------------------------------------------------|---------------------------------------------------------------------|------------------------|--------------------------------------------------|---------------------------------------------------------------------------------------------------------------------------|-------------------------------------------------------------------------------------------------------------------------------------------------------------------------------------------------------------------------------------------------------|
| (Harned et al., 2014) | Quantitative randomised controlled trial | -                 | United States                    | 181 mental health professionals actively treating anxiety disorder patients                                             | Anxiety-related presentations (combined anxiety disorders and PTSD) | Lifespan (unspecified) | Exposure therapy (general)                       | To evaluate three technology-based methods of training mental health providers in exposure therapy for anxiety disorders. | bachelors level counsellors.<br><br>$M_{age} = 37$ ( $SD = 10$ ). 71% female. 29% masters level counsellors, 28% social workers, 23% student trainee, 14% psychologists, 4% psychiatrists, 2% psychiatric nurses, and 2% bachelors level counsellors. |
| (Harned et al., 2011) | Quantitative randomised controlled trial | -                 | United States                    | 46 treatment providers at a mental health agency or students working to obtain a professional degree in a related field | Anxiety-related presentations (unspecified)                         | Lifespan (unspecified) | Exposure therapy (general)                       | To evaluate methods for training mental health providers in exposure therapies for anxiety disorders.                     | $M_{age} = 41$ ( $SD = 11$ ). 83% female. 26% social workers, 26% masters level counsellors, 24% psychologists, 4% bachelors level counsellors, 4% registered nurse or advanced registered nurse practitioner, and 15% other.                         |
| (Harned et al., 2021) | Quantitative non-randomised              | Repeated measures | United States and United Kingdom | 266 participants from five continuing education workshops focused on providing training in the dialectical              | PTSD                                                                | Lifespan (unspecified) | Dialectical behaviour therapy prolonged exposure | To examine the impact of dialectical behaviour therapy prolonged exposure workshops on clinician beliefs, adoption, and   | Unknown age. 83% cisgender women, 17% cisgender men, and 0.4% transgender. 85% licensed professionals, 9% postgraduate                                                                                                                                |

| Study                        | Design                      | Method          | Country                   | Participants                                                                                                                                | Presentation                                                              | Developmental Subgroup       | Therapy                                                                       | Aim                                                                                                                                                                                            | Sample Details                                                                                                                                                                                                                                                          |
|------------------------------|-----------------------------|-----------------|---------------------------|---------------------------------------------------------------------------------------------------------------------------------------------|---------------------------------------------------------------------------|------------------------------|-------------------------------------------------------------------------------|------------------------------------------------------------------------------------------------------------------------------------------------------------------------------------------------|-------------------------------------------------------------------------------------------------------------------------------------------------------------------------------------------------------------------------------------------------------------------------|
| (Hertz et al., 2023)         | Quantitative non-randomised | Cross-sectional | United States             | behaviour therapy prolonged exposure protocol<br><br>Records of 554 veterans newly diagnosed with OCD in the Veterans Health Administration | OCD                                                                       | Adults (unspecified)         | Exposure and response prevention                                              | perceived patient outcomes.<br><br>To examine the rates of ERP delivery in a national sample of veterans newly diagnosed with OCD in the Veterans Health Administration between 2016 and 2017. | trainee, and 5% graduate-level trainee.<br><br>Veterans: $M_{age} = 51$ ( $SD = 16$ ). 79% male. Clinicians: ERP sessions (for 22 veterans) were mostly conducted by psychologists (68%), 23% by psychology trainees, and 9% by social workers. Unknown age and gender. |
| (Hipol & Deacon, 2013)       | Quantitative descriptive    | Survey          | United States             | 51 licensed and practising psychotherapists from various professions in Wyoming                                                             | Anxiety-related presentations (combined anxiety disorders, OCD, and PTSD) | Lifespan (unspecified)       | Cognitive-behavioural therapy techniques including exposure therapy (general) | To examine the utilisation of psychotherapy techniques, especially cognitive-behavioural therapy, for anxiety disorders among community practitioners in a rural setting.                      | $M_{age} = 54$ ( $SD = 11$ ). 61% female. 29% psychologists, 27% licensed counsellors, 25% clinical social workers, 12% psychotherapists, 4% psychiatrists, and 2% licensed marriage and family counsellors.                                                            |
| (Kannis-Dymand et al., 2022) | Quantitative descriptive    | Survey          | Australia and New Zealand | 164 registered and provisionally registered psychologists                                                                                   | Anxiety disorders                                                         | Lifespan (16 years or older) | Interoceptive exposure                                                        | To examine whether psychologists often avoid undertaking interoceptive                                                                                                                         | Unknown age. 82% female.                                                                                                                                                                                                                                                |



| Study                  | Design                      | Method | Country        | Participants                                                                                                     | Presentation                    | Developmental Subgroup | Therapy                                                                                                   | Aim                                                                                                                                                                                                           | Sample Details                                                                                                                                                                                                     |
|------------------------|-----------------------------|--------|----------------|------------------------------------------------------------------------------------------------------------------|---------------------------------|------------------------|-----------------------------------------------------------------------------------------------------------|---------------------------------------------------------------------------------------------------------------------------------------------------------------------------------------------------------------|--------------------------------------------------------------------------------------------------------------------------------------------------------------------------------------------------------------------|
| (Keleher et al., 2020) | Quantitative descriptive    | Survey | United Kingdom | 107 mental health clinicians                                                                                     | OCD                             | Youth (unspecified)    | Exposure and response prevention                                                                          | exposure in Australia and New Zealand.<br>To examine the utilisation of exposure and response prevention for paediatric obsessive-compulsive disorder via an anonymous online survey completed by clinicians. | Unknown age and gender. 55% clinical psychologists, 13% nurses, 8% psychiatrists, 5% trainee clinical psychologists, 5% social workers, 4% psychotherapists, and 10% others.                                       |
| (Klan et al., 2017)    | Quantitative non-randomised | Cohort | Germany        | Records of 92 patients (with a main diagnosis agoraphobia) in an outpatient setting treated by 63 CBT therapists | Anxiety disorders (agoraphobia) | Adults (unspecified)   | In vivo exposure                                                                                          | To analyse potential predictors of the application of exposure in vivo in the treatment of agoraphobia.                                                                                                       | Patients: $M_{age} = 36$ ( $SD = 12$ ). 66% female.<br>Therapists: Unknown age and gender. 90% sessions conducted by pre-licensed CBT therapists in training under supervision and 10% by licensed CBT therapists. |
| (Kline et al., 2021)   | Quantitative descriptive    | Survey | United States  | 155 licensed mental health professionals                                                                         | PTSD                            | Adults (unspecified)   | Treatments for PTSD (e.g., prolonged exposure, cognitive processing therapy, eye movement desensitisation | To survey a range of licensed clinicians to evaluate the use of interventions to treat adults with PTSD and identify therapist characteristics associated with                                                | $M_{age} = 40$ ( $SD = 11$ ). 68% female.<br>Unknown occupation.                                                                                                                                                   |

| Study                 | Design                      | Method          | Country       | Participants                                                                                                                                       | Presentation                                | Developmental Subgroup | Therapy                                                                  | Aim                                                                                                                                                                                           | Sample Details                                                                                 |
|-----------------------|-----------------------------|-----------------|---------------|----------------------------------------------------------------------------------------------------------------------------------------------------|---------------------------------------------|------------------------|--------------------------------------------------------------------------|-----------------------------------------------------------------------------------------------------------------------------------------------------------------------------------------------|------------------------------------------------------------------------------------------------|
| (Maguen et al., 2019) | Quantitative non-randomised | Cross-sectional | United States | Records of 265,566 Iraq and Afghanistan war veterans with a post-deployment PTSD diagnosis at one of 130 Veterans Health Administration facilities | PTSD                                        | Adults (unspecified)   | and reprocessing)<br>Prolonged exposure and cognitive processing therapy | exposure training, beliefs, and utilization likelihood.<br>To examine patient and treatment factors associated with initiation and completion of EBP for PTSD in a large longitudinal cohort. | $M_{age} = 32 - 34$ ( $SD = 8 - 9$ ).<br>89% male.                                             |
| (Meyer et al., 2020)  | Quantitative descriptive    | Survey          | Australia     | 98 psychologists                                                                                                                                   | Anxiety-related presentations (unspecified) | Lifespan (unspecified) | Exposure therapy (general)                                               | To identify the beliefs exposure therapists have regarding the necessity of therapist safety behaviours and examine their relationship with therapist safety behaviour use.                   | $M_{age} = 37$ ( $SD = 11$ ). 81% female.                                                      |
| (Moritz et al., 2019) | Quantitative descriptive    | Survey          | Germany       | 216 therapists                                                                                                                                     | OCD                                         | Lifespan (unspecified) | Exposure and response prevention                                         | To determine the extent to which exposure and response prevention is conducted for OCD among therapists along with their reasons for avoiding the approach.                                   | $M_{age} = 47$ ( $SD = 10$ ). 67% female.<br>84% psychologists, 12% physicians, and 4% others. |
| (Moses et al., 2022)  | Mixed methods               | Sequential      | Australia     | 100 psychologists                                                                                                                                  | Anxiety-related presentations               | Lifespan (unspecified) | Exposure, CBT, third-wave CBT, and                                       | To examine barriers to the use of                                                                                                                                                             | $M_{age} = 41$ ( $SD = 11$ ). 84% female.                                                      |

| Study                   | Design                   | Method | Country        | Participants                                   | Presentation                                                                                                                                                                                     | Developmental Subgroup | Therapy                                                                                                      | Aim                                                                                                                                                                                                                                       | Sample Details                                                                                                                                                                                                                                                                                |
|-------------------------|--------------------------|--------|----------------|------------------------------------------------|--------------------------------------------------------------------------------------------------------------------------------------------------------------------------------------------------|------------------------|--------------------------------------------------------------------------------------------------------------|-------------------------------------------------------------------------------------------------------------------------------------------------------------------------------------------------------------------------------------------|-----------------------------------------------------------------------------------------------------------------------------------------------------------------------------------------------------------------------------------------------------------------------------------------------|
| (Moses et al., 2021)    | Quantitative descriptive | Survey | Australia      | 100 psychologists working in clinical practice | (combined anxiety disorders, OCD, and PTSD), anxiety disorders, OCD, and PTSD<br><br>Anxiety-related presentations (combined anxiety disorders, OCD, and PTSD), anxiety disorders, OCD, and PTSD | Lifespan (unspecified) | other techniques<br><br>Exposure therapy (general), exposure and response prevention, interoceptive exposure | exposure therapy in the clinical practice of psychologists treating anxiety, OCD and PTSD.<br><br>To examine the use and predictors of use of exposure therapy in psychologists who treat clients with an anxiety disorder, OCD, or PTSD. | Unknown age.<br>84% female.                                                                                                                                                                                                                                                                   |
| (Parker & Waller, 2019) | Quantitative descriptive | Survey | United Kingdom | 173 therapists                                 | Anxiety-related presentations (unspecified)                                                                                                                                                      | Lifespan (unspecified) | Exposure therapy (general)                                                                                   | To assess therapists reported use of cognitive-behavioural techniques in the treatment of anxiety disorders, and which therapist variables influence this use.                                                                            | $M_{age} = 45$ ( $SD = 11$ ). 68% female.<br>25% clinical psychologists, 18% psychiatric nurses, 12% CBT therapists, 8% counselling psychologists, 5% licensed professional counsellors, 3% clinical social workers, 1% psychiatrists, 25% other healthcare professionals, and 3% unreported. |

| Study                 | Design                      | Method | Country       | Participants                                                                      | Presentation                                                              | Developmental Subgroup | Therapy                                                                                | Aim                                                                                                                                    | Sample Details                                                                                                                                                                                   |
|-----------------------|-----------------------------|--------|---------------|-----------------------------------------------------------------------------------|---------------------------------------------------------------------------|------------------------|----------------------------------------------------------------------------------------|----------------------------------------------------------------------------------------------------------------------------------------|--------------------------------------------------------------------------------------------------------------------------------------------------------------------------------------------------|
| (Pittig et al., 2019) | Quantitative descriptive    | Survey | Germany       | 684 licensed behavioural psychotherapists working in outpatient routine care      | Anxiety-related presentations (combined anxiety disorders, OCD, and PTSD) | Lifespan (unspecified) | Exposure therapy (general), imaginal exposure, interoceptive exposure                  | To examine barriers to the dissemination of exposure from the perspective of behavioural psychotherapists.                             | $M_{age} = 46$ ( $SD = 9$ ). 79% female.                                                                                                                                                         |
| (Reid et al., 2017)   | Quantitative descriptive    | Survey | United States | 230 practising clinicians                                                         | Anxiety disorders, OCD, and PTSD                                          | Youth (7 to 17 years)  | Therapist-assisted in vivo exposure                                                    | To explore the prevalence of common barriers to the use of exposure therapy in the treatment of youth with anxiety disorders.          | $M_{age} = 49$ ( $SD = 13$ ). 72% female. 46% psychologists, 30% clinical social workers, 18% master level counsellors, 1% nurse practitioners, and 4% other mental health related professions.  |
| (Reid et al., 2018)   | Quantitative descriptive    | Survey | United States | 257 private practice therapists                                                   | Anxiety disorders, OCD, and PTSD                                          | Youth (7 to 17 years)  | Non-exposure CBT techniques, exposure techniques, third-wave CBT techniques, and other | To identify how practicing clinicians treat youth with anxiety disorders and what factors contribute to their use of exposure therapy. | $M_{age} = 49$ ( $SD = 12$ ). 75% female. 42% psychologists, 31% clinical social workers, 20% master level counsellors, 3% nurse practitioners, 1% marriage and family therapists, and 3% other. |
| (Rosen et al., 2019)  | Quantitative non-randomised | Cohort | United States | Records of 6,251 veterans receiving psychotherapy over one year in PTSD specialty | PTSD                                                                      | Adults (unspecified)   | Cognitive processing therapy and prolonged exposure                                    | To identify clinical and demographics factors associated with initiating either cognitive                                              | $M_{age} = 48 - 52$ ( $SD = 14 - 15$ ). 77 - 84% male.                                                                                                                                           |

| Study                     | Design                      | Method            | Country       | Participants                                                                                                                                                         | Presentation                                                       | Developmental Subgroup | Therapy                                                                                                           | Aim                                                                                                                                                                                       | Sample Details                                                                                                                 |
|---------------------------|-----------------------------|-------------------|---------------|----------------------------------------------------------------------------------------------------------------------------------------------------------------------|--------------------------------------------------------------------|------------------------|-------------------------------------------------------------------------------------------------------------------|-------------------------------------------------------------------------------------------------------------------------------------------------------------------------------------------|--------------------------------------------------------------------------------------------------------------------------------|
| (Rosen et al., 2017)      | Quantitative descriptive    | Survey            | United States | clinics at nine Veterans Affairs medical centres<br><br>566 licensed Veterans Health Administration mental health clinicians treating one or more veterans with PTSD | PTSD                                                               | Adults (unspecified)   | Prolonged exposure                                                                                                | processing therapy or prolonged exposure, combined and separately.<br><br>To examine aspects of clinicians' work environment that facilitate sustained use of prolonged exposure therapy. | Unknown age. 65% female. 57% psychologists, 38% social workers, and 5% others.                                                 |
| (Rowe & Kangas, 2020)     | Quantitative descriptive    | Survey            | Australia     | 115 psychologists                                                                                                                                                    | Anxiety-related presentations (combined anxiety disorders and OCD) | Adults (unspecified)   | First- and second-wave CBT techniques, motivational interviewing, non-directive counselling, and other techniques | To investigate the relative contributions of different factors in relation to the delivery of exposure therapy by psychologists.                                                          | $M_{age} = 42$ ( $SD = 11$ ). 82% female.                                                                                      |
| (Ruzek et al., 2017)      | Quantitative non-randomised | Repeated measures | United States | 1,034 licensed Veterans Health Administration mental health clinicians (734 at six-months follow-up)                                                                 | PTSD                                                               | Adults (unspecified)   | Prolonged exposure                                                                                                | To examine how changes in beliefs during an intensive training process predict adoption of prolonged exposure therapy.                                                                    | Unknown age. 67% female. 59% psychologists, 36% social workers, and 6% others.                                                 |
| (Sars & van Minnen, 2015) | Quantitative descriptive    | Survey            | Netherlands   | 490 members (i.e., psychologists, clinical psychologists, and supervisors) of the Dutch Association for                                                              | Anxiety disorders and OCD                                          | Lifespan (unspecified) | Exposure therapy (general) and other cognitive techniques                                                         | To examine the use of exposure therapy among members of a Dutch CBT association, as well as explore therapist,                                                                            | $M_{age} = 46$ ( $SD = 11$ ). 75% female. 31% were therapists in training (i.e., psychologists receiving training in CBT), 39% |

| Study                     | Design                      | Method            | Country       | Participants                                                                              | Presentation               | Developmental Subgroup | Therapy                    | Aim                                                                                                                                                                                                                                          | Sample Details                                                                                                                                                                                                                                                                                                                                                           |
|---------------------------|-----------------------------|-------------------|---------------|-------------------------------------------------------------------------------------------|----------------------------|------------------------|----------------------------|----------------------------------------------------------------------------------------------------------------------------------------------------------------------------------------------------------------------------------------------|--------------------------------------------------------------------------------------------------------------------------------------------------------------------------------------------------------------------------------------------------------------------------------------------------------------------------------------------------------------------------|
| (Schumacher et al., 2018) | Quantitative descriptive    | Survey            | Germany       | 331 cognitive behavioural therapists                                                      | Anxiety disorders and PTSD | Lifespan (unspecified) | Exposure therapy (general) | educational and contextual variables that could facilitate its dissemination in clinical practice.<br><br>To examine the dissemination and application frequency of exposure among cognitive behavioural therapists working in routine care. | were certified therapists (i.e., clinical psychologists licensed as CBT therapists), and 30% were supervisors (therapists providing training in CBT).<br><br>$M_{age} = 43$ ( $SD = 10$ ). 73% female. 82% psychological psychotherapists, 9% child and youth psychotherapists, and 5% more than one qualification.<br><br>Consultants: Unknown age. 68% female. 68% PhD |
| (Sherrill et al., 2021)   | Quantitative non-randomised | Repeated measures | United States | 40 prolonged exposure consultants, 85 of their trainees, and 102 patients of the trainees | PTSD                       | Lifespan (unspecified) | Prolonged exposure         | To evaluate the effectiveness of a training program aimed at developing a national network of community-based prolonged exposure consultants.                                                                                                | psychologists, 15% PsyD psychologists, 13% social workers, 5% mental health counsellors, and 3% psychiatrists.<br>Trainees: Unknown age. 71% female. 33% PhD<br>psychologists, 29% social                                                                                                                                                                                |

| Study                                   | Design                                   | Method          | Country                          | Participants                                                                | Presentation                                                       | Developmental Subgroup | Therapy                                                                                      | Aim                                                                                                  | Sample Details                                                                                                                                                                                                                                                                                                                                                                                                                                                                                                                                                                               |
|-----------------------------------------|------------------------------------------|-----------------|----------------------------------|-----------------------------------------------------------------------------|--------------------------------------------------------------------|------------------------|----------------------------------------------------------------------------------------------|------------------------------------------------------------------------------------------------------|----------------------------------------------------------------------------------------------------------------------------------------------------------------------------------------------------------------------------------------------------------------------------------------------------------------------------------------------------------------------------------------------------------------------------------------------------------------------------------------------------------------------------------------------------------------------------------------------|
| (van Minnen et al., 2010)               | Quantitative randomised controlled trial | -               | Unspecified (likely Netherlands) | 255 trauma experts                                                          | PTSD                                                               | Lifespan (unspecified) | Imaginal exposure, eye movement reprocessing and desensitisation, and supportive counselling | To investigate when and why therapists opt for or rule out imaginal exposure for patients with PTSD. | workers, 26% mental health counsellors, 9% PhD psychology students, and 1% psychiatrists.<br>Patients:<br>Unknown age and gender.<br><br>$M_{age} = 49$ ( $SD = 10$ ). 65% female. 46%<br>psychologists or psychotherapists, 15% social workers or social psychiatric nurses, 13% psychiatrists or physicians, 27% other (e.g., researcher or policy maker).<br>Patients: $M_{age} = 12$ ( $SD = 3$ ). 51% female.<br>Therapists:<br>Unknown age and gender. A licensed doctoral-level clinical psychologist, a postdoctoral clinical psychology fellow, and two master level psychologists. |
| (Vande Voort et al., 2010) <sup>b</sup> | Quantitative non-randomised              | Cross-sectional | United States                    | 43 child patients seen in an outpatient clinic and four treating therapists | Anxiety-related presentations (combined anxiety disorders and OCD) | Youth (6 to 18 years)  | Exposure therapy, relaxation, anxiety management, and behaviour management                   | To examine the content of clinic-based treatment for childhood anxiety disorders.                    | Unknown age and gender. A licensed doctoral-level clinical psychologist, a postdoctoral clinical psychology fellow, and two master level psychologists.                                                                                                                                                                                                                                                                                                                                                                                                                                      |

| Study                                                    | Design                                   | Method            | Country       | Participants                                                                                        | Presentation                                                       | Developmental Subgroup | Therapy                                                 | Aim                                                                                                                                                                                                                                                    | Sample Details                                                                                                                                                               |
|----------------------------------------------------------|------------------------------------------|-------------------|---------------|-----------------------------------------------------------------------------------------------------|--------------------------------------------------------------------|------------------------|---------------------------------------------------------|--------------------------------------------------------------------------------------------------------------------------------------------------------------------------------------------------------------------------------------------------------|------------------------------------------------------------------------------------------------------------------------------------------------------------------------------|
| (Wade et al., 2020)                                      | Quantitative non-randomised              | Repeated measures | Australia     | 45 psychologists                                                                                    | PTSD                                                               | Lifespan (unspecified) | Prolonged exposure                                      | To evaluate the efficacy of a prolonged exposure training workshop plus intensive consultation programme.                                                                                                                                              | Unknown age. 81% female.                                                                                                                                                     |
| (Whiteside, Biggs, Dammann, et al., 2022)                | Quantitative non-randomised              | Repeated measures | United States | 24 therapists working in the community                                                              | Anxiety-related presentations (combined anxiety disorders and OCD) | Youth (7 to 17 years)  | Exposure therapy (general) and other therapy techniques | To examine community-therapist response to a brief (90-minutes) training in technology-assisted exposure therapy for childhood anxiety disorders.                                                                                                      | Unknown age. 96% female. 63% social workers, 17% licensed marriage and family therapists, 13% licensed professional counsellors, 8% doctoral level psychologists.            |
| (Whiteside, Biggs, Ollendick, et al., 2022) <sup>b</sup> | Quantitative randomised controlled trial | -                 | United States | 17 therapists and 32 youth and a parent presenting for outpatient treatment for an anxiety disorder | Anxiety-related presentations (combined anxiety disorders and OCD) | Youth (8 to 18 years)  | Exposure therapy (in vivo, imaginal, and interoceptive) | To investigate whether brief training in the delivery of an exposure-focused and technology-assisted treatment protocol increased community therapist openness to exposure therapy, use of exposure in treatment, and improvement in patient symptoms. | Youth: $M_{age} = 12$ ( $SD = 3$ ). 78% female. Therapists: Unknown age. 94% female. 71% social workers, 18% masters-level therapists, and 12% doctoral-level psychologists. |
| (Whiteside, Deacon, et al., 2016)                        | Quantitative descriptive                 | Survey            | United States | 331 therapists from a variety of backgrounds                                                        | Anxiety-related presentations (combined anxiety)                   | Youth (unspecified)    | Exposure therapy (general), anxiety management          | To examine factors related to the use of exposure therapy by clinicians who                                                                                                                                                                            | Unknown age and gender. 43% social workers, 30% doctoral level                                                                                                               |



| Study                              | Design                                   | Method          | Country       | Participants                                                                                  | Presentation                                                                                     | Developmental Subgroup | Therapy                                                                               | Aim                                                                                                                                        | Sample Details                                                                                                                                                                                                                                                                                                                                                                                                                                             |
|------------------------------------|------------------------------------------|-----------------|---------------|-----------------------------------------------------------------------------------------------|--------------------------------------------------------------------------------------------------|------------------------|---------------------------------------------------------------------------------------|--------------------------------------------------------------------------------------------------------------------------------------------|------------------------------------------------------------------------------------------------------------------------------------------------------------------------------------------------------------------------------------------------------------------------------------------------------------------------------------------------------------------------------------------------------------------------------------------------------------|
| (Whiteside, Sattler, et al., 2016) | Quantitative non-randomised              | Cross-sectional | United States | Records of 482 treatment sessions received by 86 youth at a medical centre by 39 clinicians   | disorders, OCD, and PTSD)                                                                        | Youth (7 to 17 years)  | strategies, CBT-related techniques, and non-CBT techniques                            | treat children with anxiety disorders.                                                                                                     | psychologists, 16% masters degree licensed counsellors, 11% marriage and family therapists.<br><br>Youth: $M_{age} = 13$ ( $SD = 4$ ). 54% female.<br>Clinicians: Unknown age and gender. 50% of sessions conducted by masters level therapists and licensed clinical social workers, 31% by doctoral-level psychologists, 16% by psychiatrists and psychiatric nurse practitioners, and 4% by non-mental health providers (e.g., primary care providers). |
| (Whiteside et al., 2023)           | Quantitative randomised controlled trial | -               | United States | 25 youth with an anxiety disorder and 13 therapists working in a large regional health system | Anxiety disorders (e.g., generalised anxiety disorder, specific phobia, social anxiety disorder, | Youth (9 to 17 years)  | Exposure therapy (general), anxiety management strategies, general therapy, and other | To advance efforts to increase the quality of care for childhood anxiety disorders through better understanding the treatment delivered in | Youth: $M_{age} = 12$ ( $SD = 2$ ). 80% female.<br>Therapists: Unknown age. 100% female. 77% social workers, 15% masters level psychologists,                                                                                                                                                                                                                                                                                                              |

| Study                           | Design                   | Method | Country | Participants         | Presentation                                                                    | Developmental Subgroup | Therapy                    | Aim                                                                                                                                                                                                                              | Sample Details                                                                                                                                                               |
|---------------------------------|--------------------------|--------|---------|----------------------|---------------------------------------------------------------------------------|------------------------|----------------------------|----------------------------------------------------------------------------------------------------------------------------------------------------------------------------------------------------------------------------------|------------------------------------------------------------------------------------------------------------------------------------------------------------------------------|
| (Živčić-Bećirević et al., 2019) | Quantitative descriptive | Survey | Croatia | 226 psychotherapists | separation anxiety disorder)<br><br>Anxiety-related presentations (unspecified) | Lifespan (unspecified) | Exposure therapy (general) | community settings.<br><br>To examine therapists' attitudes toward exposure therapy and differences in beliefs according to type and level of psychotherapeutic education as well as experience with using this type of therapy. | and 8% doctoral-level psychologists.<br><br>$M_{age} = 35$ ( $SD = 8$ ). 87% female. 79% psychologists, 13% psychiatrists and psychiatry specialist trainees, and 8% others. |

*Note.*

<sup>a</sup> This article reported on three separate but related studies. Only the results of the third study were relevant to this review and were extracted and appraised.

<sup>b</sup> These studies were defined as relevant to youth, not lifespan, due to the predominant age-range of the sample.
