# Supplementary material for: Determinants of Exposure Therapy Implementation in Clinical Practice for the Treatment of Anxiety, OCD, and PTSD: A Systematic Review
Source: Springer Nature journal article supplement (doi:10.1007/s10567-024-00478-3), 2024-04-17
Supplement: MOESM3 [file 26991576]

### Online Resource 3

#### Quality Appraisal Using the MMAT

**Table 1**

*Quality Appraisal Using the MMAT (2018)*

| Study                                       | Screening and Design-Specific Criteria |                  |                           |                      |                       |                     |                           | Quality Score |
|---------------------------------------------|----------------------------------------|------------------|---------------------------|----------------------|-----------------------|---------------------|---------------------------|---------------|
|                                             | Research Questions                     | Appropriate Data | Appropriate Randomisation | Comparable Groups    | Complete Outcome Data | Blinded Assessors   | Intervention Adherence    |               |
| Quantitative Randomised Controlled          |                                        |                  |                           |                      |                       |                     |                           |               |
| (Foa et al., 2020)                          | Y                                      | Y                | Y                         | Y                    | N                     | C                   | N                         | 40%           |
| (Harned et al., 2013)                       | Y                                      | Y                | Y                         | C                    | Y                     | C                   | C                         | 40%           |
| (Harned et al., 2014)                       | Y                                      | Y                | Y                         | Y                    | Y                     | C                   | Y                         | 80%           |
| (Harned et al., 2011)                       | Y                                      | Y                | Y                         | Y                    | Y                     | C                   | Y                         | 80%           |
| (van Minnen et al., 2010)                   | Y                                      | Y                | C                         | Y                    | Y                     | N                   | Y                         | 60%           |
| (Whiteside, Biggs, Ollendick, et al., 2022) | Y                                      | Y                | N                         | Y                    | Y                     | Y                   | Y                         | 80%           |
| (Whiteside et al., 2023)                    | Y                                      | Y                | C                         | N                    | N                     | Y                   | Y                         | 40%           |
| Quantitative Non-Randomised                 |                                        |                  |                           |                      |                       |                     |                           |               |
|                                             | Research Questions                     | Appropriate Data | Representative Sample     | Appropriate Measures | Complete Outcome Data | Confounds Addressed | Intervention Administered |               |
| (Deacon et al., 2013) <sup>a</sup>          | Y                                      | Y                | Y                         | Y                    | Y                     | N                   | Y                         | 80%           |
| (Harned et al., 2021)                       | Y                                      | Y                | Y                         | Y                    | N                     | N                   | Y                         | 60%           |
| (Hertz et al., 2023)                        | Y                                      | Y                | Y                         | Y                    | Y                     | N                   | Y                         | 80%           |
| (Klan et al., 2017)                         | Y                                      | Y                | N                         | Y                    | C                     | Y                   | Y                         | 60%           |
| (Maguen et al., 2019)                       | Y                                      | Y                | Y                         | Y                    | Y                     | Y                   | Y                         | 100%          |
| (Rosen et al., 2019)                        | Y                                      | Y                | N                         | Y                    | Y                     | Y                   | Y                         | 80%           |

|                                           |   |   |   |   |   |   |   |     |
|-------------------------------------------|---|---|---|---|---|---|---|-----|
| (Ruzek et al., 2017)                      | Y | Y | C | N | Y | Y | Y | 60% |
| (Sherrill et al., 2021)                   | Y | Y | Y | Y | N | N | Y | 60% |
| (Vande Voort et al., 2010)                | Y | Y | N | Y | C | N | Y | 40% |
| (Wade et al., 2020)                       | Y | Y | C | N | Y | Y | Y | 60% |
| (Whiteside, Biggs, Dammann, et al., 2022) | Y | Y | C | Y | C | Y | Y | 60% |
| (Whiteside, Sattler, et al., 2016)        | Y | Y | N | N | Y | N | Y | 40% |

## Quantitative Descriptive

|                                        | Research Questions | Appropriate Data | Appropriate Sampling | Representative Sample | Appropriate Measures | Low Response Bias | Appropriate Analysis |      |
|----------------------------------------|--------------------|------------------|----------------------|-----------------------|----------------------|-------------------|----------------------|------|
| (C. B. Becker et al., 2004)            | Y                  | Y                | Y                    | N                     | N                    | N                 | N                    | 20%  |
| (S. Becker et al., 2018)               | Y                  | Y                | Y                    | Y                     | C                    | C                 | Y                    | 60%  |
| (Becker-Haimes et al., 2020)           | Y                  | Y                | N                    | Y                     | Y                    | Y                 | Y                    | 80%  |
| (Becker-Haimes et al., 2017)           | Y                  | Y                | Y                    | Y                     | Y                    | C                 | Y                    | 80%  |
| (Chen et al., 2022)                    | Y                  | Y                | Y                    | Y                     | Y                    | C                 | Y                    | 80%  |
| (Cook, Dinnen, Thompson, et al., 2015) | Y                  | Y                | Y                    | Y                     | Y                    | Y                 | Y                    | 100% |
| (Cook, Thompson, et al., 2015)         | Y                  | Y                | Y                    | N                     | N                    | Y                 | Y                    | 60%  |
| (Cook, Thompson, et al., 2020)         | Y                  | Y                | Y                    | N                     | N                    | C                 | Y                    | 40%  |
| (de Jong et al., 2020)                 | Y                  | Y                | N                    | N                     | Y                    | N                 | Y                    | 40%  |
| (Finley et al., 2015)                  | Y                  | Y                | Y                    | Y                     | N                    | N                 | Y                    | 60%  |
| (Garcia et al., 2020)                  | Y                  | Y                | Y                    | Y                     | Y                    | N                 | Y                    | 80%  |
| (Hipol & Deacon, 2013)                 | Y                  | Y                | Y                    | Y                     | Y                    | N                 | Y                    | 80%  |
| (Kannis-Dymand et al., 2022)           | Y                  | Y                | Y                    | Y                     | Y                    | N                 | Y                    | 80%  |
| (Keleher et al., 2020)                 | Y                  | Y                | Y                    | Y                     | Y                    | C                 | Y                    | 80%  |
| (Kline et al., 2021)                   | Y                  | Y                | N                    | N                     | N                    | C                 | Y                    | 20%  |

|                                     |                    |                  |                   |                       |                         |                       |                    |     |
|-------------------------------------|--------------------|------------------|-------------------|-----------------------|-------------------------|-----------------------|--------------------|-----|
| (Meyer et al., 2020)                | Y                  | Y                | N                 | Y                     | Y                       | N                     | Y                  | 60% |
| (Moritz et al., 2019)               | Y                  | Y                | Y                 | Y                     | N                       | N                     | Y                  | 60% |
| (Moses et al., 2021)                | Y                  | Y                | Y                 | Y                     | N                       | C                     | Y                  | 60% |
| (Parker & Waller, 2019)             | Y                  | Y                | C                 | N                     | Y                       | N                     | Y                  | 40% |
| (Pittig et al., 2019)               | Y                  | Y                | Y                 | Y                     | N                       | N                     | Y                  | 60% |
| (Rosen et al., 2017)                | Y                  | Y                | Y                 | Y                     | N                       | N                     | Y                  | 60% |
| (Reid et al., 2017)                 | Y                  | Y                | C                 | Y                     | Y                       | N                     | Y                  | 60% |
| (Reid et al., 2018)                 | Y                  | Y                | Y                 | Y                     | Y                       | N                     | Y                  | 80% |
| (Rowe & Kangas, 2020)               | Y                  | Y                | N                 | N                     | Y                       | N                     | Y                  | 40% |
| (Sars & van Minnen, 2015)           | Y                  | Y                | C                 | N                     | N                       | N                     | Y                  | 20% |
| (Schumacher et al., 2018)           | Y                  | Y                | Y                 | Y                     | N                       | N                     | N                  | 40% |
| (Whiteside, Deacon, et al., 2016)   | Y                  | Y                | Y                 | Y                     | Y                       | N                     | Y                  | 80% |
| (Živčić-Bećirević et al., 2019)     | Y                  | Y                | C                 | N                     | C                       | C                     | Y                  | 20% |
| Mixed Methods                       |                    |                  |                   |                       |                         |                       |                    |     |
|                                     | Research Questions | Appropriate Data | Methods Rationale | Effective Integration | Adequate Interpretation | Divergences Addressed | Quality Components |     |
| (Cook, Dinnen, Coyne, et al., 2015) | Y                  | Y                | N                 | N                     | N                       | N                     | N                  | 0%  |
| (Cook et al., 2014)                 | Y                  | Y                | C                 | C                     | N                       | N                     | N                  | 0%  |
| (Cook et al., 2013)                 | Y                  | Y                | N                 | N                     | N                       | Y                     | N                  | 20% |
| (Cook, Simiola, et al., 2020)       | Y                  | Y                | Y                 | Y                     | Y                       | C                     | C                  | 60% |
| (Moses et al., 2022)                | Y                  | Y                | Y                 | Y                     | N                       | C                     | N                  | 40% |

*Note.* Y = Yes; N = No; C = Can't tell. The five core design-specific criteria were used to calculate a percentage indicative of overall quality, which was categorised as very low (i.e.,  $\leq 20\%$ ), low (i.e., 40%), moderate (i.e., 60%), high (i.e., 80%), and very high (i.e., 100%).

<sup>a</sup> This article reported on three separate but related studies. Only the results of the third study were relevant to this review and were extracted and appraised.
