# Supplementary material for: Determinants of Exposure Therapy Implementation in Clinical Practice for the Treatment of Anxiety, OCD, and PTSD: A Systematic Review
Source: Springer Nature journal article supplement (doi:10.1007/s10567-024-00478-3), 2024-04-17
Supplement: MOESM4 [file 26991576]

**Online Resource 4**

**Frequency of Results Exploring Each Domain of the TDF Categorised by Presentation and Developmental Subgroup**

**Table 1**

*Frequency of Results Exploring Each Domain of the TDF Categorised by Presentation and Developmental Subgroup*

| Category                                                                                       | TDF Domains |             |             |             |           |             |           |            |            |           |             |             |             |             | Unclassified Results |
|------------------------------------------------------------------------------------------------|-------------|-------------|-------------|-------------|-----------|-------------|-----------|------------|------------|-----------|-------------|-------------|-------------|-------------|----------------------|
|                                                                                                | K           | S           | SPRI        | BACA        | O         | BACO        | R         | I          | G          | MAD       | ECR         | SI          | E           | BR          |                      |
| Overall Number of Results (Percentage of Mapped Results)                                       |             |             |             |             |           |             |           |            |            |           |             |             |             |             |                      |
|                                                                                                | 48<br>(12%) | 22<br>(6%)  | 87<br>(22%) | 17<br>(4%)  | 0<br>(0%) | 59<br>(15%) | 0<br>(0%) | 7<br>(2%)  | 13<br>(3%) | 0<br>(0%) | 82<br>(21%) | 22<br>(6%)  | 30<br>(8%)  | 2<br>(1%)   | 5                    |
| Number of Results (with Percentage of Results for that Domain) for Each Presentation           |             |             |             |             |           |             |           |            |            |           |             |             |             |             |                      |
| Anxiety Disorders                                                                              | 10<br>(21%) | 3<br>(14%)  | 8<br>(9%)   | 1<br>(6%)   | 0         | 10<br>(17%) | 0         | 1<br>(14%) | 1<br>(8%)  | 0         | 6<br>(7%)   | 2<br>(9%)   | 12<br>(40%) | 0<br>(0%)   | 1                    |
| OCD                                                                                            | 9<br>(19%)  | 4<br>(18%)  | 14<br>(16%) | 1<br>(6%)   | 0         | 4<br>(7%)   | 0         | 1<br>(14%) | 1<br>(8%)  | 0         | 3<br>(4%)   | 2<br>(9%)   | 4<br>(13%)  | 0<br>(0%)   | 1                    |
| PTSD                                                                                           | 15<br>(31%) | 8<br>(36%)  | 53<br>(61%) | 10<br>(59%) | 0         | 25<br>(42%) | 0         | 2<br>(29%) | 4<br>(31%) | 0         | 49<br>(60%) | 9<br>(41%)  | 3<br>(10%)  | 0<br>(0%)   | 3                    |
| Anxiety-Related Presentations                                                                  | 14<br>(29%) | 7<br>(32%)  | 12<br>(14%) | 5<br>(29%)  | 0         | 20<br>(34%) | 0         | 3<br>(43%) | 7<br>(54%) | 0         | 24<br>(29%) | 9<br>(41%)  | 11<br>(37%) | 2<br>(100%) | 0                    |
| Number of Results (with Percentage of Results for that Domain) for Each Developmental Subgroup |             |             |             |             |           |             |           |            |            |           |             |             |             |             |                      |
| Youth                                                                                          | 6<br>(13%)  | 6<br>(27%)  | 16<br>(18%) | 1<br>(6%)   | 0         | 10<br>(17%) | 0         | 1<br>(14%) | 5<br>(38%) | 0         | 13<br>(16%) | 2<br>(9%)   | 12<br>(40%) | 2<br>(100%) | 3                    |
| Adults                                                                                         | 9<br>(19%)  | 2<br>(9%)   | 55<br>(63%) | 7<br>(41%)  | 0         | 22<br>(37%) | 0         | 2<br>(29%) | 4<br>(31%) | 0         | 49<br>(60%) | 13<br>(59%) | 8<br>(27%)  | 0<br>(0%)   | 2                    |
| Lifespan                                                                                       | 33<br>(69%) | 14<br>(64%) | 16<br>(18%) | 9<br>(53%)  | 0         | 27<br>(46%) | 0         | 4<br>(57%) | 4<br>(31%) | 0         | 20<br>(24%) | 7<br>(32%)  | 10<br>(33%) | 0<br>(0%)   | 0                    |

*Note.* Mapped results totalled 389 with 5 additional results unclassifiable. K = Knowledge. S = Skills. SPRI = Social/Professional Role and Identity. BACA = Beliefs about Capabilities. O = Optimism. BACO = Beliefs about Consequences. R = Reinforcement. I = Intentions. G = Goals. MAD = Memory, Attention, and Decision Processes. ECR = Environmental Context and Resources. SI = Social Influences. E = Emotion. BR = Behavioural Regulation. Lifespan is defined as unspecified developmental subgroups or a combination of youth and adult developmental subgroups. Anxiety-related presentations are defined as an unspecified or specified a combination of anxiety disorders, OCD, and PTSD.
