# Supplementary material for: Determinants of Exposure Therapy Implementation in Clinical Practice for the Treatment of Anxiety, OCD, and PTSD: A Systematic Review
Source: Springer Nature journal article supplement (doi:10.1007/s10567-024-00478-3), 2024-04-17
Supplement: MOESM5 [file 26991576]

## Online Resource 5

### Domains on the TDF Explored by the Individual Studies

**Table 1**

*Domains on the TDF Explored by the Individual Studies*

| Study                                  | TDF Domains |   |      |      |   |      |   |   |   |     |     |    |   |    | Unclassified |   |
|----------------------------------------|-------------|---|------|------|---|------|---|---|---|-----|-----|----|---|----|--------------|---|
|                                        | K           | S | SPRI | BACA | O | BACO | R | I | G | MAD | ECR | SI | E | BR |              |   |
| (C. B. Becker et al., 2004)            | ✓           | ✓ |      |      |   |      |   |   |   |     |     |    |   |    |              |   |
| (S. Becker et al., 2018)               |             | ✓ |      |      |   | ✓    |   |   |   |     |     |    |   |    |              |   |
| (Becker-Haimes et al., 2020)           |             |   |      |      |   |      |   |   |   |     | ✓   |    |   |    |              |   |
| (Becker-Haimes et al., 2017)           | ✓           | ✓ |      |      |   |      |   | ✓ | ✓ |     | ✓   | ✓  | ✓ | ✓  |              |   |
| (Chen et al., 2022)                    |             |   | ✓    |      |   | ✓    |   |   |   |     |     |    |   |    |              |   |
| (Cook, Dinnen, Coyne, et al., 2015)    |             |   |      |      |   | ✓    |   |   |   |     | ✓   | ✓  |   |    |              |   |
| (Cook, Dinnen, Thompson, et al., 2015) |             |   | ✓    |      |   | ✓    |   | ✓ |   |     | ✓   | ✓  |   |    |              |   |
| (Cook et al., 2014)                    | ✓           |   | ✓    |      |   |      |   |   |   |     |     |    |   |    |              | ✓ |
| (Cook et al., 2013)                    | ✓           |   |      |      |   |      |   |   |   |     |     |    |   |    |              |   |
| (Cook, Simiola, et al., 2020)          |             |   |      |      |   |      |   |   |   |     | ✓   | ✓  |   |    |              |   |
| (Cook, Thompson, & Schnurr, 2015)      |             |   |      |      |   | ✓    |   |   |   |     |     |    |   |    |              |   |
| (Cook, Thompson, et al., 2020)         |             |   | ✓    |      |   | ✓    |   |   | ✓ |     | ✓   |    |   |    |              | ✓ |
| (Deacon et al., 2013)                  |             |   |      |      |   | ✓    |   |   |   |     |     |    |   |    |              |   |
| (de Jong et al., 2020)                 |             | ✓ | ✓    |      |   | ✓    |   |   |   |     | ✓   |    |   | ✓  |              |   |
| (Finley et al., 2015)                  |             | ✓ | ✓    |      |   | ✓    |   |   |   |     | ✓   | ✓  |   |    |              |   |
| (Foa et al., 2020)                     |             |   |      |      |   |      |   |   |   |     |     | ✓  |   |    |              |   |
| (Garcia et al., 2020)                  | ✓           |   | ✓    |      |   |      |   |   |   |     |     |    |   |    |              |   |
| (Harned et al., 2013)                  | ✓           | ✓ | ✓    | ✓    |   | ✓    |   | ✓ |   |     | ✓   | ✓  | ✓ |    |              |   |
| (Harned et al., 2014)                  |             | ✓ |      |      |   |      |   |   |   |     |     | ✓  |   |    |              |   |



| Study                                       | TDF Domains |       |       |       |      |       |      |       |       |      |       |       |       |      | Unclassified |
|---------------------------------------------|-------------|-------|-------|-------|------|-------|------|-------|-------|------|-------|-------|-------|------|--------------|
|                                             | K           | S     | SPRI  | BACA  | O    | BACO  | R    | I     | G     | MAD  | ECR   | SI    | E     | BR   |              |
| (Whiteside, Biggs, Dammann, et al., 2022)   | ✓           |       |       |       |      |       |      |       |       |      |       |       |       |      |              |
| (Whiteside, Biggs, Ollendick, et al., 2022) |             | ✓     |       |       |      |       |      |       | ✓     |      |       |       |       |      |              |
| (Whiteside, Deacon, et al., 2016)           |             | ✓     | ✓     | ✓     |      | ✓     |      |       |       |      |       |       |       |      |              |
| (Whiteside, Sattler, et al., 2016)          |             |       |       |       |      |       |      |       |       |      | ✓     |       |       |      |              |
| (Whiteside et al., 2023)                    |             |       |       |       |      |       |      |       |       |      | ✓     |       |       |      |              |
| (Živčić-Bećirević et al., 2019)             |             |       |       |       |      | ✓     |      |       |       |      |       |       |       |      |              |
| Number of Studies (% of Total)              | 16          | 17    | 24    | 8     | 0    | 27    | 0    | 5     | 7     | 0    | 22    | 13    | 10    | 1    | 3            |
| Exploring Each Domain                       | (31%)       | (33%) | (46%) | (15%) | (0%) | (52%) | (0%) | (10%) | (13%) | (0%) | (42%) | (25%) | (19%) | (2%) | (6%)         |

*Note.* Mapped results totalled 389 with 5 additional results unclassifiable. K = Knowledge. S = Skills. SPRI = Social/Professional Role and Identity. BACA = Beliefs about Capabilities. O = Optimism. BACO = Beliefs about Consequences. R = Reinforcement. I = Intentions. G = Goals. MAD = Memory, Attention, and Decision Processes. ECR = Environmental Context and Resources. SI = Social Influences. E = Emotion. BR = Behavioural Regulation.
