# Supplementary material for: Determinants of Exposure Therapy Implementation in Clinical Practice for the Treatment of Anxiety, OCD, and PTSD: A Systematic Review
Source: Springer Nature journal article supplement (doi:10.1007/s10567-024-00478-3), 2024-04-17
Supplement: MOESM6 [file 26991576]

**Online Resource 6**

**Summary of Results of Included Studies**

**Table 1**

*Summary of Results of Included Studies*

| TDF Domains | Study                        | Construct Focus | Constructs                                                             | Notes | Relationship to ET Use          | Presentation                  | Developmental Subgroup |
|-------------|------------------------------|-----------------|------------------------------------------------------------------------|-------|---------------------------------|-------------------------------|------------------------|
| Knowledge   | (C. B. Becker et al., 2004)  | Clinician       | Engagement in imaginal exposure training.                              | -     | Positively related              | PTSD                          | Lifespan               |
|             | (C. B. Becker et al., 2004)  | Clinician       | Engagement in imaginal exposure training.                              | -     | Positively related              | PTSD                          | Lifespan               |
|             | (Becker-Haimes et al., 2017) | Clinician       | Knowledge of exposure as an evidence-based practice.                   | -     | Unrelated                       | Anxiety-related presentations | Youth                  |
|             | (Becker-Haimes et al., 2017) | Clinician       | Training in exposure therapy.                                          | -     | Unrelated                       | Anxiety-related presentations | Youth                  |
|             | (Cook et al., 2014)          | Clinician       | Level of training in prolonged exposure.                               | -     | Positively related              | PTSD                          | Adults                 |
|             | (Cook et al., 2013)          | Clinician       | Level of training in prolonged exposure.                               | -     | Positively related              | PTSD                          | Adults                 |
|             | (Garcia et al., 2020)        | Clinician       | Certified through the national prolonged exposure training initiative. | -     | Positively related              | PTSD                          | Adults                 |
|             | (Garcia et al., 2020)        | Clinician       | Received CBT training in graduate school.                              | -     | Unrelated                       | PTSD                          | Adults                 |
|             | (Harned et al., 2013)        | Clinician       | Knowledge of exposure therapy and ability to apply it.                 | -     | Positively related <sup>a</sup> | Anxiety-related presentations | Lifespan               |

| TDF Domains | Study                        | Construct Focus | Constructs                                                                                    | Notes                                                                                                        | Relationship to ET Use | Presentation                  | Developmental Subgroup |
|-------------|------------------------------|-----------------|-----------------------------------------------------------------------------------------------|--------------------------------------------------------------------------------------------------------------|------------------------|-------------------------------|------------------------|
|             | (Kannis-Dymand et al., 2022) | Clinician       | Receipt of specific training in exposure therapy (e.g., at university, reading, supervision). | -                                                                                                            | Positively related     | Anxiety disorders             | Lifespan               |
|             | (Kline et al., 2021)         | Clinician       | Training in exposure therapy.                                                                 | -                                                                                                            | Positively related     | PTSD                          | Adults                 |
|             | (Moses et al., 2022)         | Clinician       | Training on exposure therapy within postgraduate education.                                   | -                                                                                                            | Unrelated              | Anxiety-related presentations | Lifespan               |
|             | (Moses et al., 2022)         | Clinician       | Training on exposure therapy within postgraduate education.                                   | Unrelated to the use of exposure therapy for anxiety and interoceptive exposure for panic disorder.          | Unrelated              | Anxiety disorders             | Lifespan               |
|             | (Moses et al., 2022)         | Clinician       | Training on exposure therapy within postgraduate education.                                   | -                                                                                                            | Unrelated              | OCD                           | Lifespan               |
|             | (Moses et al., 2022)         | Clinician       | Training on exposure therapy within postgraduate education.                                   | -                                                                                                            | Unrelated              | PTSD                          | Lifespan               |
|             | (Moses et al., 2022)         | Clinician       | Training on exposure therapy via professional workshop or conference attendance.              | -                                                                                                            | Unrelated              | Anxiety-related presentations | Lifespan               |
|             | (Moses et al., 2022)         | Clinician       | Training on exposure therapy via professional workshop or conference attendance.              | Positively related to the use of exposure therapy for anxiety and interoceptive exposure for panic disorder. | Positively related     | Anxiety disorders             | Lifespan               |
|             | (Moses et al., 2022)         | Clinician       | Training on exposure therapy via professional workshop or conference attendance.              | -                                                                                                            | Unrelated              | OCD                           | Lifespan               |
|             | (Moses et al., 2022)         | Clinician       | Training on exposure therapy via professional workshop or conference attendance.              | -                                                                                                            | Positively related     | PTSD                          | Lifespan               |

| TDF Domains | Study                | Construct Focus | Constructs                                                                     | Notes                                                                                                        | Relationship to ET Use          | Presentation                  | Developmental Subgroup |
|-------------|----------------------|-----------------|--------------------------------------------------------------------------------|--------------------------------------------------------------------------------------------------------------|---------------------------------|-------------------------------|------------------------|
|             | (Moses et al., 2022) | Clinician       | Training on exposure therapy via supervision with an experienced professional. | -                                                                                                            | Unrelated                       | Anxiety-related presentations | Lifespan               |
|             | (Moses et al., 2022) | Clinician       | Training on exposure therapy via supervision with an experienced professional. | Unrelated to the use of exposure therapy for anxiety and interoceptive exposure for panic disorder.          | Unrelated                       | Anxiety disorders             | Lifespan               |
|             | (Moses et al., 2022) | Clinician       | Training on exposure therapy via supervision with an experienced professional. | -                                                                                                            | Unrelated                       | OCD                           | Lifespan               |
|             | (Moses et al., 2022) | Clinician       | Training on exposure therapy via supervision with an experienced professional. | -                                                                                                            | Unrelated                       | PTSD                          | Lifespan               |
|             | (Moses et al., 2022) | Clinician       | Training on exposure therapy within a specialist anxiety clinic.               | -                                                                                                            | Unrelated                       | Anxiety-related presentations | Lifespan               |
|             | (Moses et al., 2022) | Clinician       | Training on exposure therapy within a specialist anxiety clinic.               | Positively related to the use of exposure therapy for anxiety and interoceptive exposure for panic disorder. | Positively related              | Anxiety disorders             | Lifespan               |
|             | (Moses et al., 2022) | Clinician       | Training on exposure therapy within a specialist anxiety clinic.               | -                                                                                                            | Unrelated                       | OCD                           | Lifespan               |
|             | (Moses et al., 2022) | Clinician       | Training on exposure therapy within a specialist anxiety clinic.               | -                                                                                                            | Positively related              | PTSD                          | Lifespan               |
|             | (Moses et al., 2022) | Clinician       | Knowledge about exposure therapy.                                              | -                                                                                                            | Positively related <sup>a</sup> | Anxiety-related presentations | Lifespan               |
|             | (Moses et al., 2022) | Clinician       | Knowledge about exposure therapy.                                              | Positively related to the use of exposure therapy for anxiety and interoceptive exposure for panic disorder. | Positively related              | Anxiety disorders             | Lifespan               |

| TDF Domains | Study                     | Construct Focus | Constructs                                                                                                                                                                   | Notes                                                                                                                                                                    | Relationship to ET Use | Presentation                  | Developmental Subgroup |
|-------------|---------------------------|-----------------|------------------------------------------------------------------------------------------------------------------------------------------------------------------------------|--------------------------------------------------------------------------------------------------------------------------------------------------------------------------|------------------------|-------------------------------|------------------------|
|             | (Moses et al., 2022)      | Clinician       | Knowledge about exposure therapy.                                                                                                                                            | -                                                                                                                                                                        | Positively related     | OCD                           | Lifespan               |
|             | (Moses et al., 2022)      | Clinician       | Knowledge about exposure therapy.                                                                                                                                            | -                                                                                                                                                                        | Positively related     | PTSD                          | Lifespan               |
|             | (Parker & Waller, 2019)   | Clinician       | Additional post-qualification accreditation.                                                                                                                                 | -                                                                                                                                                                        | Unrelated              | Anxiety-related presentations | Lifespan               |
|             | (Reid et al., 2018)       | Clinician       | Training in exposure-based techniques during and/or after graduate school.                                                                                                   | -                                                                                                                                                                        | Positively related     | Anxiety disorders             | Youth                  |
|             | (Reid et al., 2018)       | Clinician       | Training in exposure-based techniques during and/or after graduate school.                                                                                                   | -                                                                                                                                                                        | Positively related     | OCD                           | Youth                  |
|             | (Reid et al., 2018)       | Clinician       | Training in exposure-based techniques during and/or after graduate school.                                                                                                   | -                                                                                                                                                                        | Unrelated              | PTSD                          | Youth                  |
|             | (Rowe & Kangas, 2020)     | Clinician       | Understanding of the mechanisms of change underlying exposure, according to the habituation model.                                                                           | Negatively related to frequency of use. Unrelated to in-session duration of use.                                                                                         | Negatively related     | Anxiety-related presentations | Adults                 |
|             | (Rowe & Kangas, 2020)     | Clinician       | Understanding of the mechanisms of change underlying exposure, according to the cognitive model.                                                                             | Positively related to frequency of use. Unrelated to in-session duration of use.                                                                                         | Positively related     | Anxiety-related presentations | Adults                 |
|             | (Rowe & Kangas, 2020)     | Clinician       | Understanding of the mechanisms of change underlying exposure, according to the inhibitory learning model.                                                                   | Positively related to frequency and in-session duration of use.                                                                                                          | Positively related     | Anxiety-related presentations | Adults                 |
|             | (Rowe & Kangas, 2020)     | Clinician       | Extent to which training received to date has covered exposure therapy.                                                                                                      | Unrelated to frequency and in-session duration of use.                                                                                                                   | Unrelated              | Anxiety-related presentations | Adults                 |
|             | (Sars & van Minnen, 2015) | Clinician       | Extent of exposure training in practical skills. Measured and analysed separately for each of the presentations (i.e., social anxiety, specific phobia, and panic disorder). | Positively related to use of therapist-directed in vivo exposure, in vivo self-exposure, and exposure-based homework assignments for social anxiety. Unrelated to use of | Positively related     | Anxiety disorders             | Lifespan               |

| TDF Domains | Study                     | Construct Focus | Constructs                                               | Notes                                                                                                                                                                                                                                                                                                                                                                                                                                                                                                                                                                                                                                                                                                                                                                                                                                                                                                                          | Relationship to ET Use | Presentation | Developmental Subgroup |
|-------------|---------------------------|-----------------|----------------------------------------------------------|--------------------------------------------------------------------------------------------------------------------------------------------------------------------------------------------------------------------------------------------------------------------------------------------------------------------------------------------------------------------------------------------------------------------------------------------------------------------------------------------------------------------------------------------------------------------------------------------------------------------------------------------------------------------------------------------------------------------------------------------------------------------------------------------------------------------------------------------------------------------------------------------------------------------------------|------------------------|--------------|------------------------|
|             |                           |                 |                                                          | <p>imaginal exposure, exposure and response prevention and interoceptive exposure for social anxiety.</p> <p>Positively related to use of therapist-directed in vivo exposure, in vivo self-exposure, and exposure-based homework assignments for specific phobia. Unrelated to use of imaginal exposure, exposure and response prevention and interoceptive exposure for specific phobia.</p> <p>Positively related to use of therapist-directed in vivo exposure, in vivo self-exposure, interoceptive exposure, and exposure-based homework assignments for panic disorder. Unrelated to use of imaginal exposure and exposure and response prevention for panic disorder.</p> <p>Positively related to use of therapist-directed in vivo exposure, in vivo self-exposure, exposure and response prevention, and exposure-based homework assignments. Unrelated to use of imaginal exposure and interoceptive exposure.</p> |                        |              |                        |
|             | (Sars & van Minnen, 2015) | Clinician       | Extent of exposure training in practical skills for OCD. |                                                                                                                                                                                                                                                                                                                                                                                                                                                                                                                                                                                                                                                                                                                                                                                                                                                                                                                                | Positively related     | OCD          | Lifespan               |

| TDF Domains | Study                     | Construct Focus | Constructs                                                                                                                                                                    | Notes                                                                                                                                                                                                                                                                        | Relationship to ET Use | Presentation      | Developmental Subgroup |
|-------------|---------------------------|-----------------|-------------------------------------------------------------------------------------------------------------------------------------------------------------------------------|------------------------------------------------------------------------------------------------------------------------------------------------------------------------------------------------------------------------------------------------------------------------------|------------------------|-------------------|------------------------|
|             |                           |                 |                                                                                                                                                                               | Positively related to use of therapist-directed in vivo exposure, in vivo self-exposure, and exposure-based homework assignments for social anxiety. Unrelated to use of imaginal exposure, exposure and response prevention, interoceptive exposure for social anxiety.     |                        |                   |                        |
|             | (Sars & van Minnen, 2015) | Clinician       | Extent of exposure training in diagnostic skills. Measured and analysed separately for each of the presentations (i.e., social anxiety, specific phobia, and panic disorder). | Positively related to use of in vivo self-exposure and exposure-based homework assignments for specific phobia. Unrelated to use of therapist-directed in vivo exposure, imaginal exposure, exposure and response prevention and interoceptive exposure for specific phobia. | Positively related     | Anxiety disorders | Lifespan               |
|             |                           |                 |                                                                                                                                                                               | Positively related to use of therapist-directed in vivo exposure, in vivo self-exposure, interoceptive exposure, and exposure-based homework assignments for panic disorder. Unrelated to use of imaginal exposure and exposure and response prevention for panic disorder.  |                        |                   |                        |
|             | (Sars & van Minnen, 2015) | Clinician       | Extent of exposure training in diagnostic skills for OCD.                                                                                                                     | Positively related to use of therapist-directed in vivo exposure, in vivo self-exposure, exposure and response prevention, and exposure-based homework assignments. Unrelated to use of imaginal                                                                             | Positively related     | OCD               | Lifespan               |

| TDF Domains | Study                     | Construct Focus | Constructs                                                                                                                                                                   | Notes                                                                                                                                                                                                                                                                                                                                                                                                                                                                                                                                                                                                                                                                                                                                                                                                                                                                                               | Relationship to ET Use | Presentation      | Developmental Subgroup |
|-------------|---------------------------|-----------------|------------------------------------------------------------------------------------------------------------------------------------------------------------------------------|-----------------------------------------------------------------------------------------------------------------------------------------------------------------------------------------------------------------------------------------------------------------------------------------------------------------------------------------------------------------------------------------------------------------------------------------------------------------------------------------------------------------------------------------------------------------------------------------------------------------------------------------------------------------------------------------------------------------------------------------------------------------------------------------------------------------------------------------------------------------------------------------------------|------------------------|-------------------|------------------------|
|             |                           |                 |                                                                                                                                                                              | <p>exposure and interoceptive exposure.</p> <p>Positively related to use of therapist-directed in vivo exposure, in vivo self-exposure, and exposure-based homework assignments for social anxiety. Unrelated to use of imaginal exposure, exposure and response prevention, interoceptive exposure for social anxiety.</p> <p>Positively related to use of therapist-directed in vivo exposure, in vivo self-exposure, and exposure-based homework assignments for specific phobia. Unrelated to use of imaginal exposure, exposure and response prevention and interoceptive exposure for specific phobia.</p> <p>Positively related to use of therapist-directed in vivo exposure, in vivo self-exposure, interoceptive exposure, and exposure-based homework assignments for panic disorder. Unrelated to use of imaginal exposure and exposure and response prevention for panic disorder.</p> |                        |                   |                        |
|             | (Sars & van Minnen, 2015) | Clinician       | Extent of exposure training in empirical skills. Measured and analysed separately for each of the presentations (i.e., social anxiety, specific phobia, and panic disorder). |                                                                                                                                                                                                                                                                                                                                                                                                                                                                                                                                                                                                                                                                                                                                                                                                                                                                                                     | Positively related     | Anxiety disorders | Lifespan               |
|             | (Sars & van Minnen, 2015) | Clinician       | Extent of exposure training in empirical skills for OCD.                                                                                                                     | Positively related to use of therapist-directed in vivo exposure, in vivo self-exposure, exposure and                                                                                                                                                                                                                                                                                                                                                                                                                                                                                                                                                                                                                                                                                                                                                                                               | Positively related     | OCD               | Lifespan               |

| TDF Domains | Study                                     | Construct Focus | Constructs                                                                                                                                                                                                                                        | Notes                                                                                                                                                                                                                                                                                                                                                                                                                                                                        | Relationship to ET Use | Presentation                  | Developmental Subgroup |          |
|-------------|-------------------------------------------|-----------------|---------------------------------------------------------------------------------------------------------------------------------------------------------------------------------------------------------------------------------------------------|------------------------------------------------------------------------------------------------------------------------------------------------------------------------------------------------------------------------------------------------------------------------------------------------------------------------------------------------------------------------------------------------------------------------------------------------------------------------------|------------------------|-------------------------------|------------------------|----------|
|             | (van Minnen et al., 2010)                 | Clinician       | Training in imaginal exposure.                                                                                                                                                                                                                    | response prevention, and exposure-based homework assignments. Unrelated to use of imaginal exposure and interoceptive exposure.                                                                                                                                                                                                                                                                                                                                              | -                      | Positively related            | PTSD                   | Lifespan |
|             | (Wade et al., 2020)                       | Clinician       | Completion of a three-day interactive prolonged exposure therapy workshop, followed by at least 10 fortnightly one-hour group telephone consultations for six-months.                                                                             | For all participants: Positively related to proportionate provision of prolonged exposure in vivo. Unrelated to proportional provision of prolonged exposure: rational and psychoeducation; imaginal; breathing retraining.<br><br>For completers (83.33% of sample): Positively related to proportionate provision of prolonged exposure in vivo. Unrelated to proportionate provision of prolonged exposure: rational and psychoeducation; imaginal; breathing retraining. | Positively related     | PTSD                          | Lifespan               |          |
|             | (Whiteside, Biggs, Dammann, et al., 2022) | Clinician       | Completion of training in an online and mobile-based application (Mayo Clinic Anxiety Coach) to conduct parent-coached exposure therapy. Involved 60 to 90-minute training phone call and provision of an iPod Touch, instructions, and a manual. | Unrelated to number of therapists reporting use of exposure therapy. Positively related to proportional use of exposure therapy.                                                                                                                                                                                                                                                                                                                                             | Positively related     | Anxiety-related presentations | Youth                  |          |
| Skills      | (C. B. Becker et al., 2004)               | Clinician       | Experience treating PTSD.                                                                                                                                                                                                                         | -                                                                                                                                                                                                                                                                                                                                                                                                                                                                            | Positively related     | PTSD                          | Lifespan               |          |
|             | (S. Becker et al., 2018)                  | Clinician       | Number of outpatient psychotherapy sessions completed in career.                                                                                                                                                                                  | -                                                                                                                                                                                                                                                                                                                                                                                                                                                                            | Positively related     | Anxiety disorders             | Lifespan               |          |



| TDF Domains | Study                        | Construct Focus | Constructs                                                                                                                                                                                                                                                                       | Notes | Relationship to ET Use | Presentation                  | Developmental Subgroup |
|-------------|------------------------------|-----------------|----------------------------------------------------------------------------------------------------------------------------------------------------------------------------------------------------------------------------------------------------------------------------------|-------|------------------------|-------------------------------|------------------------|
|             | (Becker-Haimes et al., 2017) | Clinician       | Years of experience.                                                                                                                                                                                                                                                             | -     | Unrelated              | Anxiety-related presentations | Youth                  |
|             | (de Jong et al., 2020)       | Clinician       | Years of experience.                                                                                                                                                                                                                                                             | -     | Unrelated              | Anxiety-related presentations | Youth                  |
|             | (Finley et al., 2015)        | Clinician       | Years licensed as a provider.                                                                                                                                                                                                                                                    | -     | Unrelated              | PTSD                          | Adults                 |
|             | (Harned et al., 2013)        | Clinician       | Years of experience working as a treatment provider since receiving degree.                                                                                                                                                                                                      | -     | Unrelated              | Anxiety-related presentations | Lifespan               |
|             | (Harned et al., 2014)        | Clinician       | Online training on exposure therapy consisting of didactic instruction and simulated clinical scenarios.                                                                                                                                                                         | -     | Positively related     | Anxiety-related presentations | Lifespan               |
|             | (Harned et al., 2011)        | Clinician       | Online training in exposure therapy involving instructions and client simulations combined with one to two motivational interviewing phone calls. Compared to online control training in dialectical behaviour therapy.                                                          | -     | Unrelated              | Anxiety-related presentations | Lifespan               |
|             | (Harned et al., 2021)        | Clinician       | Experience with exposure for PTSD.                                                                                                                                                                                                                                               | -     | Unrelated              | PTSD                          | Lifespan               |
|             | (Harned et al., 2021)        | Clinician       | Four-day workshop (facilitated by developer and co-trainer) compared to two-day workshop (facilitated by developer) on dialectical behaviour therapy prolonged exposure. Workshop involved group activities, case-based learning, demonstrations, discussions, and role-playing. | -     | Unrelated              | PTSD                          | Lifespan               |

| TDF Domains | Study                     | Construct Focus | Constructs                                            | Notes                                                                                                                                                                                                                                                                                                                                                                                                                                                                                                                                                           | Relationship to ET Use | Presentation      | Developmental Subgroup |
|-------------|---------------------------|-----------------|-------------------------------------------------------|-----------------------------------------------------------------------------------------------------------------------------------------------------------------------------------------------------------------------------------------------------------------------------------------------------------------------------------------------------------------------------------------------------------------------------------------------------------------------------------------------------------------------------------------------------------------|------------------------|-------------------|------------------------|
|             | (Keleher et al., 2020)    | Clinician       | Years of experience in current role.                  | -                                                                                                                                                                                                                                                                                                                                                                                                                                                                                                                                                               | Unrelated              | OCD               | Youth                  |
|             | (Keleher et al., 2020)    | Clinician       | Number of OCD cases treated.                          | -                                                                                                                                                                                                                                                                                                                                                                                                                                                                                                                                                               | Unrelated              | OCD               | Youth                  |
|             | (Moses et al., 2021)      | Clinician       | Years of experience.                                  | Unrelated to general, imaginal, and interoceptive exposure use.                                                                                                                                                                                                                                                                                                                                                                                                                                                                                                 | Unrelated              | Anxiety disorders | Lifespan               |
|             | (Moses et al., 2021)      | Clinician       | Years of experience.                                  | Unrelated to general exposure and exposure and response prevention use.                                                                                                                                                                                                                                                                                                                                                                                                                                                                                         | Unrelated              | OCD               | Lifespan               |
|             | (Moses et al., 2021)      | Clinician       | Years of experience.                                  | Unrelated to general and imaginal exposure use.                                                                                                                                                                                                                                                                                                                                                                                                                                                                                                                 | Unrelated              | PTSD              | Lifespan               |
|             | (Ruzek et al., 2017)      | Clinician       | Years of experience.                                  | -                                                                                                                                                                                                                                                                                                                                                                                                                                                                                                                                                               | Unrelated              | PTSD              | Adults                 |
|             | (Sars & van Minnen, 2015) | Clinician       | Treatment experience with anxiety disorders in years. | Positively related to use of imaginal exposure for social anxiety.<br>Unrelated to use of therapist-directed in vivo exposure, in vivo self-exposure, exposure and response prevention, interoceptive exposure, and exposure-based homework assignments for social anxiety.<br>Positively related to use of imaginal exposure and interoceptive exposure for specific phobia.<br>Unrelated to use of therapist-directed in vivo exposure, in vivo self-exposure, exposure and response prevention, and exposure-based homework assignments for specific phobia. | Positively related     | Anxiety disorders | Lifespan               |

| TDF Domains | Study                                       | Construct Focus | Constructs                                                                                                                                                                                                                          | Notes                                                                                                                                                                                                                                                                    | Relationship to ET Use | Presentation                  | Developmental Subgroup |
|-------------|---------------------------------------------|-----------------|-------------------------------------------------------------------------------------------------------------------------------------------------------------------------------------------------------------------------------------|--------------------------------------------------------------------------------------------------------------------------------------------------------------------------------------------------------------------------------------------------------------------------|------------------------|-------------------------------|------------------------|
|             |                                             |                 |                                                                                                                                                                                                                                     | Positively related to use of imaginal exposure for panic disorder. Unrelated to use of therapist-directed in vivo exposure, in vivo self-exposure, exposure and response prevention, interoceptive exposure, and exposure-based homework assignments for panic disorder. |                        |                               |                        |
|             | (Sars & van Minnen, 2015)                   | Clinician       | Treatment experience with anxiety disorders in years.                                                                                                                                                                               | Positively related to use of imaginal exposure and exposure and response prevention. Unrelated to use of therapist-directed in vivo exposure, in vivo self-exposure, interoceptive exposure, and exposure-based homework assignments.                                    | Positively related     | OCD                           | Lifespan               |
|             | (Schumacher et al., 2018)                   | Clinician       | Number of exposure sessions completed in training.                                                                                                                                                                                  | Unrelated for being a user (in 1 – 80% of cases) and a frequent user (in 81% or more of cases), relative to non-users.                                                                                                                                                   | Unrelated              | PTSD                          | Lifespan               |
|             | (Sherrill et al., 2021)                     | Clinician       | Completion of a six-month competency-based learning program for prolonged exposure. Involved live weekly training calls, completion of at least six sessions of prolonged exposure with two patients, and one weekly group meeting. | -                                                                                                                                                                                                                                                                        | Positively related     | PTSD                          | Lifespan               |
|             | (Whiteside, Biggs, Ollendick, et al., 2022) | Clinician       | Expertise in using parent-coached exposure therapy for childhood anxiety disorders.                                                                                                                                                 | Unrelated to overall implementation of exposure (i.e., combining education, planning, and completing) and during in-session                                                                                                                                              | Positively related     | Anxiety-related presentations | Youth                  |

| TDF Domains                           | Study                                  | Construct Focus | Constructs                                                              | Notes                                                                                                                                                                                                    | Relationship to ET Use | Presentation                  | Developmental Subgroup |
|---------------------------------------|----------------------------------------|-----------------|-------------------------------------------------------------------------|----------------------------------------------------------------------------------------------------------------------------------------------------------------------------------------------------------|------------------------|-------------------------------|------------------------|
|                                       |                                        |                 |                                                                         | exposure during treatment phase. Positively related to in vivo and imaginal exposure use during treatment phase. Positively related to percentage of sessions with any imaginal or in vivo exposure use. |                        |                               |                        |
|                                       | (Whiteside, Deacon, et al., 2016)      | Clinician       | Years of experience.                                                    | -                                                                                                                                                                                                        | Unrelated              | Anxiety-related presentations | Youth                  |
| Social/Professional Role and Identity | (Chen et al., 2022)                    | Client          | Aged 60 years or older (relative to 18 to 59 years).                    | -                                                                                                                                                                                                        | Negatively related     | Anxiety-related presentations | Adults                 |
|                                       | (Chen et al., 2022)                    | Clinician       | Highest clinical qualification in psychology.                           | -                                                                                                                                                                                                        | Unrelated              | Anxiety-related presentations | Adults                 |
|                                       | (Cook, Dinnen, Thompson, et al., 2015) | Clinician       | Professional discipline (psychiatrist, psychologist, or social worker). | -                                                                                                                                                                                                        | Unrelated              | PTSD                          | Adults                 |
|                                       | (Cook et al., 2014)                    | Clinician       | Occupation (psychiatrist, psychologist, social worker, or nurse).       | -                                                                                                                                                                                                        | Unrelated              | PTSD                          | Adults                 |
|                                       | (Cook, Thompson, et al., 2020)         | Clinician       | Occupation as a psychiatrist.                                           | -                                                                                                                                                                                                        | Unrelated              | PTSD                          | Adults                 |
|                                       | (Cook, Thompson, et al., 2020)         | Clinician       | Occupation as a psychologist.                                           | -                                                                                                                                                                                                        | Unrelated              | PTSD                          | Adults                 |
|                                       | (Cook, Thompson, et al., 2020)         | Clinician       | Occupation as a social worker.                                          | -                                                                                                                                                                                                        | Unrelated              | PTSD                          | Adults                 |

| TDF Domains | Study                  | Construct Focus | Constructs                                                                                                                                           | Notes | Relationship to ET Use | Presentation                  | Developmental Subgroup |
|-------------|------------------------|-----------------|------------------------------------------------------------------------------------------------------------------------------------------------------|-------|------------------------|-------------------------------|------------------------|
|             | (de Jong et al., 2020) | Clinician       | Age.                                                                                                                                                 | -     | Negatively related     | Anxiety-related presentations | Youth                  |
|             | (de Jong et al., 2020) | Clinician       | Endorsement of a pure cognitive-behavioural theoretical orientation (vs. combined or other orientation).                                             | -     | Positively related     | Anxiety-related presentations | Youth                  |
|             | (Finley et al., 2015)  | Clinician       | Endorsement of a primary cognitive-behavioural theoretical orientation.                                                                              | -     | Unrelated              | PTSD                          | Adults                 |
|             | (Garcia et al., 2020)  | Clinician       | Occupation as a psychologist (relative to a social worker).                                                                                          | -     | Unrelated              | PTSD                          | Adults                 |
|             | (Garcia et al., 2020)  | Clinician       | Theoretical orientation as cognitive-behavioural.                                                                                                    | -     | Unrelated              | PTSD                          | Adults                 |
|             | (Harned et al., 2013)  | Clinician       | Higher academic degree achieved (i.e., bachelors level, masters level, doctoral level).                                                              | -     | Positively related     | Anxiety-related presentations | Lifespan               |
|             | (Harned et al., 2013)  | Clinician       | Endorsement of cognitive and/or behavioural theoretical orientation.                                                                                 | -     | Unrelated              | Anxiety-related presentations | Lifespan               |
|             | (Hertz et al., 2023)   | Client          | Age.                                                                                                                                                 | -     | Negatively related     | OCD                           | Adults                 |
|             | (Hertz et al., 2023)   | Client          | Gender, dichotomised as male, female.                                                                                                                | -     | Unrelated              | OCD                           | Adults                 |
|             | (Hertz et al., 2023)   | Client          | Race, categorised as American Indian or Alaska Native, Asian, Black or African American, Native Hawaiian or other Pacific Islander, White, or other. | -     | Unrelated              | OCD                           | Adults                 |
|             | (Hertz et al., 2023)   | Client          | Marital status, categorised as divorced, married, never married, separated, widow, or unknown.                                                       | -     | Unrelated              | OCD                           | Adults                 |

| TDF Domains | Study                  | Construct Focus | Constructs                                                                                                                                                  | Notes                                                                                                                                                    | Relationship to ET Use | Presentation                  | Developmental Subgroup |
|-------------|------------------------|-----------------|-------------------------------------------------------------------------------------------------------------------------------------------------------------|----------------------------------------------------------------------------------------------------------------------------------------------------------|------------------------|-------------------------------|------------------------|
|             | (Hertz et al., 2023)   | Client          | Ethnicity, categorised as Hispanic or Latino, not Hispanic or Latino, or unknown.                                                                           | -                                                                                                                                                        | Unrelated              | OCD                           | Adults                 |
|             | Hipol & Deacon, 2013)  | Clinician       | Self-identification as an anxiety specialist.                                                                                                               | Unrelated for therapist-assisted in vivo exposure, self-directed in vivo exposure, and imaginal exposure. Positively related for interoceptive exposure. | Positively related     | Anxiety-related presentations | Lifespan               |
|             | (Keleher et al., 2020) | Clinician       | Professional background in clinical psychology relative to other backgrounds (e.g., nursing, psychiatry, psychotherapy).                                    | Positively related overall and for taboo symptoms but unrelated for other symptom domains (i.e., contamination, aggression, hoarding).                   | Positively related     | OCD                           | Youth                  |
|             | (Keleher et al., 2020) | Clinician       | Cognitive-behavioural therapeutic orientation relative to other orientations (e.g., family therapy/systemic, psychodynamic, dialectical behaviour therapy). | Unrelated overall and for most symptom domains (i.e., taboo, contamination, hoarding) but positively related for aggressive symptoms.                    | Unrelated              | OCD                           | Youth                  |
|             | (Klan et al., 2017)    | Client          | Self-reported family status (i.e., in a stable relationship).                                                                                               | -                                                                                                                                                        | Unrelated              | Anxiety disorders             | Adults                 |
|             | (Maguen et al., 2019)  | Client          | Aged 30-49 (relative to <30).                                                                                                                               | -                                                                                                                                                        | Positively related     | PTSD                          | Adults                 |
|             | (Maguen et al., 2019)  | Client          | Aged 50+ (relative to <30).                                                                                                                                 | -                                                                                                                                                        | Unrelated              | PTSD                          | Adults                 |
|             | (Maguen et al., 2019)  | Client          | Gender as female (relative to male).                                                                                                                        | -                                                                                                                                                        | Negatively related     | PTSD                          | Adults                 |
|             | (Maguen et al., 2019)  | Client          | Race as Black/African American (relative to White).                                                                                                         | -                                                                                                                                                        | Positively related     | PTSD                          | Adults                 |
|             | (Maguen et al., 2019)  | Client          | Race as American Indian or Alaska Native (relative to White).                                                                                               | -                                                                                                                                                        | Unrelated              | PTSD                          | Adults                 |

| TDF Domains | Study                 | Construct Focus | Constructs                                                             | Notes | Relationship to ET Use | Presentation | Developmental Subgroup |
|-------------|-----------------------|-----------------|------------------------------------------------------------------------|-------|------------------------|--------------|------------------------|
|             | (Maguen et al., 2019) | Client          | Race as Asian (relative to White).                                     | -     | Unrelated              | PTSD         | Adults                 |
|             | (Maguen et al., 2019) | Client          | Race as Native Hawaiian or Other Pacific Islander (relative to White). | -     | Unrelated              | PTSD         | Adults                 |
|             | (Maguen et al., 2019) | Client          | Race as multi-Race (relative to White).                                | -     | Unrelated              | PTSD         | Adults                 |
|             | (Maguen et al., 2019) | Client          | Ethnicity as Not Hispanic or Latino (relative to Hispanic or Latino).  | -     | Negatively related     | PTSD         | Adults                 |
|             | (Maguen et al., 2019) | Client          | Ethnicity as Other (relative to Hispanic or Latino).                   | -     | Negatively related     | PTSD         | Adults                 |
|             | (Maguen et al., 2019) | Client          | Service branch as Navy (relative to Air Force).                        | -     | Negatively related     | PTSD         | Adults                 |
|             | (Maguen et al., 2019) | Client          | Service branch as Army (relative to Air Force).                        | -     | Unrelated              | PTSD         | Adults                 |
|             | (Maguen et al., 2019) | Client          | Service branch as Coast Guard (relative to Air Force).                 | -     | Unrelated              | PTSD         | Adults                 |
|             | (Maguen et al., 2019) | Client          | Service branch as Marine (relative to Air Force).                      | -     | Unrelated              | PTSD         | Adults                 |
|             | (Maguen et al., 2019) | Client          | Service component as National Guard (relative to Active Duty).         | -     | Positively related     | PTSD         | Adults                 |
|             | (Maguen et al., 2019) | Client          | Service component as Reserve (relative to Active Duty).                | -     | Positively related     | PTSD         | Adults                 |
|             | (Maguen et al., 2019) | Client          | Rank as Officer (relative to Enlisted).                                | -     | Positively related     | PTSD         | Adults                 |
|             | (Maguen et al., 2019) | Client          | Rank as Warrant (relative to Enlisted).                                | -     | Unrelated              | PTSD         | Adults                 |
|             | (Maguen et al., 2019) | Client          | Having had multiple deployments (relative to a single deployment).     | -     | Positively related     | PTSD         | Adults                 |

| TDF Domains | Study                 | Construct Focus | Constructs                                                                                                                              | Notes                                                                                                         | Relationship to ET Use | Presentation      | Developmental Subgroup |
|-------------|-----------------------|-----------------|-----------------------------------------------------------------------------------------------------------------------------------------|---------------------------------------------------------------------------------------------------------------|------------------------|-------------------|------------------------|
|             | (Maguen et al., 2019) | Client          | Having served in a combat zone.                                                                                                         | -                                                                                                             | Positively related     | PTSD              | Adults                 |
|             | (Maguen et al., 2019) | Client          | Relationship status as never married (relative to married).                                                                             | -                                                                                                             | Negatively related     | PTSD              | Adults                 |
|             | (Maguen et al., 2019) | Client          | Relationship status as divorced/separated/single (relative to married).                                                                 | -                                                                                                             | Negatively related     | PTSD              | Adults                 |
|             | (Maguen et al., 2019) | Client          | Relationship status as widow/widower/widowed (relative to married).                                                                     | -                                                                                                             | Unrelated              | PTSD              | Adults                 |
|             | (Maguen et al., 2019) | Client          | Education level.                                                                                                                        | -                                                                                                             | Positively related     | PTSD              | Adults                 |
|             | (Moritz et al., 2019) | Clinician       | Professional background as a psychologist, relative to a physician.                                                                     | -                                                                                                             | Positively related     | OCD               | Lifespan               |
|             | (Moses et al., 2021)  | Clinician       | Cognitive-behavioural theoretical orientation, relative to other orientations.                                                          | Unrelated to general and interoceptive exposure use.                                                          | Unrelated              | Anxiety disorders | Lifespan               |
|             | (Moses et al., 2021)  | Clinician       | Cognitive-behavioural theoretical orientation, relative to other orientations.                                                          | Unrelated to general exposure and exposure and response prevention use.                                       | Unrelated              | OCD               | Lifespan               |
|             | (Moses et al., 2021)  | Clinician       | Cognitive-behavioural theoretical orientation, relative to other orientations.                                                          | Unrelated to general and imaginal exposure use.                                                               | Unrelated              | PTSD              | Lifespan               |
|             | (Moses et al., 2021)  | Clinician       | Registration status as a psychologist, categorised as provisionally registered, fully registered, or fully registered with endorsement. | Related to general, imaginal, and interoceptive exposure use. Direction unspecified.                          | Related                | Anxiety disorders | Lifespan               |
|             | (Moses et al., 2021)  | Clinician       | Highest level of training, categorised as bachelor's degree, master of psychology, clinical masters/doctorate, research PhD.            | Related to general exposure use. Unrelated to imaginal and interoceptive exposure use. Direction unspecified. | Related                | Anxiety disorders | Lifespan               |



| TDF Domains | Study                   | Construct Focus | Constructs                                                                                                                              | Notes                                                                                                      | Relationship to ET Use | Presentation                  | Developmental Subgroup |
|-------------|-------------------------|-----------------|-----------------------------------------------------------------------------------------------------------------------------------------|------------------------------------------------------------------------------------------------------------|------------------------|-------------------------------|------------------------|
|             | (Moses et al., 2021)    | Clinician       | Registration status as a psychologist, categorised as provisionally registered, fully registered, or fully registered with endorsement. | Unrelated to general exposure and exposure and response prevention use.                                    | Unrelated              | OCD                           | Lifespan               |
|             | (Moses et al., 2021)    | Clinician       | Highest level of training, categorised as bachelor's degree, master of psychology, clinical masters/doctorate, research PhD.            | Unrelated to general exposure use. Related to exposure and response prevention use. Direction unspecified. | Related                | OCD                           | Lifespan               |
|             | (Moses et al., 2021)    | Clinician       | Registration status as a psychologist, categorised as provisionally registered, fully registered, or fully registered with endorsement. | Unrelated to general exposure use. Related to imaginal exposure use. Direction unspecified.                | Related                | PTSD                          | Lifespan               |
|             | (Moses et al., 2021)    | Clinician       | Highest level of training, categorised as bachelor's degree, master of psychology, clinical masters/doctorate, research PhD.            | Related to general exposure use. Unrelated to imaginal exposure use. Direction unspecified.                | Related                | PTSD                          | Lifespan               |
|             | (Parker & Waller, 2019) | Clinician       | Profession as a counselling psychologist relative to psychiatric nurse, CBT therapist, clinical psychologist, or other.                 | -                                                                                                          | Positively related     | Anxiety-related presentations | Lifespan               |
|             | (Reid et al., 2018)     | Clinician       | Gender (female, relative to male).                                                                                                      | -                                                                                                          | Unrelated              | Anxiety disorders             | Youth                  |
|             | (Reid et al., 2018)     | Clinician       | Gender (female, relative to male).                                                                                                      | -                                                                                                          | Unrelated              | OCD                           | Youth                  |
|             | (Reid et al., 2018)     | Clinician       | Gender (female, relative to male).                                                                                                      | -                                                                                                          | Unrelated              | PTSD                          | Youth                  |
|             | (Reid et al., 2018)     | Clinician       | Self-reported specialisation in anxiety disorders.                                                                                      | -                                                                                                          | Unrelated              | Anxiety disorders             | Youth                  |
|             | (Reid et al., 2018)     | Clinician       | Self-reported specialisation in anxiety disorders.                                                                                      | -                                                                                                          | Positively related     | OCD                           | Youth                  |
|             | (Reid et al., 2018)     | Clinician       | Self-reported specialisation in anxiety disorders.                                                                                      | -                                                                                                          | Positively related     | PTSD                          | Youth                  |

| TDF Domains | Study                | Construct Focus | Constructs                                                                | Notes                                                                                                       | Relationship to ET Use | Presentation      | Developmental Subgroup |
|-------------|----------------------|-----------------|---------------------------------------------------------------------------|-------------------------------------------------------------------------------------------------------------|------------------------|-------------------|------------------------|
|             | (Reid et al., 2018)  | Clinician       | More than two years of graduate education, relative to one to two years.  | -                                                                                                           | Unrelated              | Anxiety disorders | Youth                  |
|             | (Reid et al., 2018)  | Clinician       | More than two years of graduate education, relative to one to two years.  | -                                                                                                           | Unrelated              | OCD               | Youth                  |
|             | (Reid et al., 2018)  | Clinician       | More than two years of graduate education, relative to one to two years.  | -                                                                                                           | Unrelated              | PTSD              | Youth                  |
|             | (Rosen et al., 2019) | Client          | Age.                                                                      | Negatively related, relative to initiation of other psychotherapies – but not cognitive processing therapy. | Negatively related     | PTSD              | Adults                 |
|             | (Rosen et al., 2019) | Client          | Gender (male, relative to female).                                        | -                                                                                                           | Positively related     | PTSD              | Adults                 |
|             | (Rosen et al., 2019) | Client          | Race as White.                                                            | Negatively related, relative to cognitive processing therapy - but not other psychotherapies.               | Negatively related     | PTSD              | Adults                 |
|             | (Rosen et al., 2019) | Client          | Race as Black.                                                            | Positively related, relative to cognitive processing therapy - but not other psychotherapies.               | Positively related     | PTSD              | Adults                 |
|             | (Rosen et al., 2019) | Client          | Race as Other (American Indian, Asian, Hawaiian, Multi-Race, or Unknown). | Positively related, relative to other psychotherapies - but not cognitive processing therapy.               | Positively related     | PTSD              | Adults                 |
|             | (Rosen et al., 2019) | Client          | Ethnicity as Hispanic or Latino.                                          | -                                                                                                           | Unrelated              | PTSD              | Adults                 |
|             | (Rosen et al., 2019) | Client          | Marital status as never married, separated/divorced/widowed, or married.  | -                                                                                                           | Unrelated              | PTSD              | Adults                 |
|             | (Rosen et al., 2017) | Clinician       | Profession as a psychologist (relative to a psychiatrist/other).          | -                                                                                                           | Unrelated              | PTSD              | Adults                 |
|             | (Rosen et al., 2017) | Clinician       | Profession as a social worker (relative to a psychiatrist/other).         | -                                                                                                           | Unrelated              | PTSD              | Adults                 |

| TDF Domains | Study                             | Construct Focus | Constructs                                                                                                                    | Notes                                                                                                                                                                                                                                                                                                                                                                              | Relationship to ET Use | Presentation                  | Developmental Subgroup |
|-------------|-----------------------------------|-----------------|-------------------------------------------------------------------------------------------------------------------------------|------------------------------------------------------------------------------------------------------------------------------------------------------------------------------------------------------------------------------------------------------------------------------------------------------------------------------------------------------------------------------------|------------------------|-------------------------------|------------------------|
|             | (Rosen et al., 2017)              | Clinician       | Gender as male (relative to female).                                                                                          | -                                                                                                                                                                                                                                                                                                                                                                                  | Positively related     | PTSD                          | Adults                 |
|             | (Rowe & Kangas, 2020)             | Clinician       | Highest qualification achieved in psychology (i.e., clinical psychology, other postgraduate degree, or other qualifications). | Positively related to frequency of use. Unrelated to in-session duration of use.                                                                                                                                                                                                                                                                                                   | Positively related     | Anxiety-related presentations | Adults                 |
|             | (Ruzek et al., 2017)              | Clinician       | Gender (male, relative to female).                                                                                            | -                                                                                                                                                                                                                                                                                                                                                                                  | Positively related     | PTSD                          | Adults                 |
|             | (Ruzek et al., 2017)              | Clinician       | Cognitive-behavioural therapy orientation (relative to no cognitive-behavioural therapy orientation).                         | -                                                                                                                                                                                                                                                                                                                                                                                  | Unrelated              | PTSD                          | Adults                 |
|             | (Ruzek et al., 2017)              | Clinician       | Occupation as a psychologist (relative to psychiatrist/other).                                                                | -                                                                                                                                                                                                                                                                                                                                                                                  | Positively related     | PTSD                          | Adults                 |
|             | (Ruzek et al., 2017)              | Clinician       | Occupation as a social worker (relative to psychiatrist/other).                                                               | -                                                                                                                                                                                                                                                                                                                                                                                  | Positively related     | PTSD                          | Adults                 |
|             | (Schumacher et al., 2018)         | Clinician       | Age.                                                                                                                          | For panic disorder: Unrelated for being a user (in 1 – 80% of cases), relative to non-user. Negatively related for being a frequent user (in 81% or more of cases), relative to non-user.<br><br>For phobia: Unrelated for being a user (in 1 – 80% of cases), relative to non-user. Negatively related for being a frequent user (in 81% or more of cases), relative to non-user. | Negatively related     | Anxiety disorders             | Lifespan               |
|             | (van Minnen et al., 2010)         | Clinician       | Sex as male, relative to female.                                                                                              | -                                                                                                                                                                                                                                                                                                                                                                                  | Positively related     | PTSD                          | Lifespan               |
|             | (Whiteside, Deacon, et al., 2016) | Clinician       | Theoretical orientation other than just CBT.                                                                                  | However, pure CBT orientation reported greater endorsed use than both CBT plus other orientations                                                                                                                                                                                                                                                                                  | Negatively related     | Anxiety-related presentations | Youth                  |

| TDF Domains                | Study                             | Construct Focus | Constructs                                                | Notes                                                                                                                                                                                                                                                                                                                                                                                                                                                                                                                                                               | Relationship to ET Use | Presentation                  | Developmental Subgroup |
|----------------------------|-----------------------------------|-----------------|-----------------------------------------------------------|---------------------------------------------------------------------------------------------------------------------------------------------------------------------------------------------------------------------------------------------------------------------------------------------------------------------------------------------------------------------------------------------------------------------------------------------------------------------------------------------------------------------------------------------------------------------|------------------------|-------------------------------|------------------------|
|                            |                                   |                 |                                                           | and other orientations. CBT plus other orientations reported greater endorsed use than other orientations.                                                                                                                                                                                                                                                                                                                                                                                                                                                          |                        |                               |                        |
|                            | (Whiteside, Deacon, et al., 2016) | Clinician       | Self-identified expertise in childhood anxiety disorders. | -                                                                                                                                                                                                                                                                                                                                                                                                                                                                                                                                                                   | Unrelated              | Anxiety-related presentations | Youth                  |
|                            | (Whiteside, Deacon, et al., 2016) | Clinician       | Profession with a PhD.                                    | PhD psychologists reported greater endorsed and proportional use, relative to PsyD psychologists, social workers, masters degree licensed counsellors, marriage and family therapists. PsyD psychologists reported higher proportional use than marriage and family therapists.                                                                                                                                                                                                                                                                                     | Positively related     | Anxiety-related presentations | Youth                  |
| Beliefs about Capabilities | (Harned et al., 2013)             | Clinician       | Confidence in ability to use exposure-therapy.            | Confidence in ability to use exposure-therapy was unrelated overall. However, high confidence in ability to use exposure-therapy predicted higher use in those who completed online training (10-hour online course), motivational enhancement (brief five-minute video and simulated discussion with a virtual exposure therapy consultant), and an online learning community (eight one-hour learning community meetings facilitated by an experienced exposure therapy clinician). Compared to those with high confidence who only completed online training and | Positively related     | Anxiety-related presentations | Lifespan               |

| TDF Domains | Study                   | Construct Focus | Constructs                                                           | Notes                                                                                                        | Relationship to ET Use          | Presentation                  | Developmental Subgroup |
|-------------|-------------------------|-----------------|----------------------------------------------------------------------|--------------------------------------------------------------------------------------------------------------|---------------------------------|-------------------------------|------------------------|
|             |                         |                 |                                                                      | online training plus motivational enhancement.                                                               |                                 |                               |                        |
|             | (Harned et al., 2021)   | Clinician       | Self-efficacy with dialectical behaviour therapy.                    | -                                                                                                            | Unrelated                       | PTSD                          | Lifespan               |
|             | (Harned et al., 2021)   | Clinician       | Self-efficacy with dialectical behaviour therapy prolonged exposure. | -                                                                                                            | Positively related              | PTSD                          | Lifespan               |
|             | (Moses et al., 2022)    | Clinician       | Confidence to use exposure therapy.                                  | -                                                                                                            | Positively related <sup>a</sup> | Anxiety-related presentations | Lifespan               |
|             | (Moses et al., 2022)    | Clinician       | Confidence to use exposure therapy.                                  | Positively related to the use of exposure therapy for anxiety and interoceptive exposure for panic disorder. | Positively related              | Anxiety disorders             | Lifespan               |
|             | (Moses et al., 2022)    | Clinician       | Confidence to use exposure therapy.                                  | -                                                                                                            | Positively related              | OCD                           | Lifespan               |
|             | (Moses et al., 2022)    | Clinician       | Confidence to use exposure therapy.                                  | -                                                                                                            | Positively related              | PTSD                          | Lifespan               |
|             | (Parker & Waller, 2019) | Clinician       | Self-esteem.                                                         | -                                                                                                            | Unrelated                       | Anxiety-related presentations | Lifespan               |
|             | (Pittig et al., 2019)   | Clinician       | Self-reported competence conducting exposure.                        | -                                                                                                            | Positively related              | Anxiety-related presentations | Lifespan               |
|             | (Rosen et al., 2017)    | Clinician       | Self-efficacy to deliver prolonged exposure.                         | -                                                                                                            | Unrelated                       | PTSD                          | Adults                 |
|             | (Rosen et al., 2017)    | Clinician       | Perceived control over treatment plan.                               | -                                                                                                            | Unrelated                       | PTSD                          | Adults                 |
|             | (Rosen et al., 2017)    | Clinician       | Perceived control over own schedule.                                 | -                                                                                                            | Unrelated                       | PTSD                          | Adults                 |

| TDF Domains                | Study                             | Construct Focus | Constructs                                                 | Notes                                                                                                                                                                                                                                                                          | Relationship to ET Use | Presentation                  | Developmental Subgroup |
|----------------------------|-----------------------------------|-----------------|------------------------------------------------------------|--------------------------------------------------------------------------------------------------------------------------------------------------------------------------------------------------------------------------------------------------------------------------------|------------------------|-------------------------------|------------------------|
|                            | (Ruzek et al., 2017)              | Clinician       | Self-efficacy to deliver prolonged exposure.               | Pre-training baseline levels and change throughout training unrelated.                                                                                                                                                                                                         | Unrelated              | PTSD                          | Adults                 |
|                            | (Ruzek et al., 2017)              | Clinician       | Self-efficacy to receive referrals for prolonged exposure. | Pre-training baseline levels and change throughout training positively related.                                                                                                                                                                                                | Positively related     | PTSD                          | Adults                 |
|                            | (Ruzek et al., 2017)              | Clinician       | Control over treatment plan.                               | Pre-training baseline levels and change throughout training unrelated.                                                                                                                                                                                                         | Unrelated              | PTSD                          | Adults                 |
|                            | (Ruzek et al., 2017)              | Clinician       | Control over schedule.                                     | Pre-training baseline levels unrelated. Change throughout training positively related.                                                                                                                                                                                         | Positively related     | PTSD                          | Adults                 |
|                            | (Whiteside, Deacon, et al., 2016) | Clinician       | Perceived resiliency of children with anxiety disorders.   | -                                                                                                                                                                                                                                                                              | Positively related     | Anxiety-related presentations | Youth                  |
| Optimism                   | -                                 | -               | -                                                          | -                                                                                                                                                                                                                                                                              | -                      | -                             | -                      |
|                            |                                   |                 |                                                            | Negatively related to overall endorsement of exposure therapy use and at least one performance of therapist-guided exposures (relative to none) for most recent client.                                                                                                        |                        |                               |                        |
| Beliefs about Consequences | (S. Becker et al., 2018)          | Clinician       | Negative beliefs about exposure.                           | Unrelated to frequency of therapist-guided exposures in vivo, self-administered exposures in vivo, and interoceptive exposures for most recent client. Also unrelated to both at least one performance of exposure or self-exposure (relative to none) for most recent client. | Negatively related     | Anxiety disorders             | Lifespan               |

| TDF Domains | Study                                  | Construct Focus | Constructs                                                                                                                                                                                                         | Notes                                                                   | Relationship to ET Use | Presentation                  | Developmental Subgroup |
|-------------|----------------------------------------|-----------------|--------------------------------------------------------------------------------------------------------------------------------------------------------------------------------------------------------------------|-------------------------------------------------------------------------|------------------------|-------------------------------|------------------------|
|             | (S. Becker et al., 2018)               | Clinician       | Concerns about rejection of exposure therapy by patient.                                                                                                                                                           | -                                                                       | Negatively related     | Anxiety disorders             | Lifespan               |
|             | (S. Becker et al., 2018)               | Clinician       | Concerns about side-effects of exposure therapy.                                                                                                                                                                   | -                                                                       | Negatively related     | Anxiety disorders             | Lifespan               |
|             | (Chen et al., 2022)                    | Clinician       | Negative beliefs about exposure.                                                                                                                                                                                   | Negatively related to exposure use in older anxious adults (60+ years). | Negatively related     | Anxiety-related presentations | Adults                 |
|             | (Cook, Dinnen, Coyne, et al., 2015)    | Clinician       | Degree to which the innovation (prolonged exposure) is considered superior to existing practices.                                                                                                                  | -                                                                       | Unrelated              | PTSD                          | Adults                 |
|             | (Cook, Dinnen, Coyne, et al., 2015)    | Clinician       | Degree to which the innovation's (prolonged exposure) results are observable to others.                                                                                                                            | -                                                                       | Unrelated              | PTSD                          | Adults                 |
|             | (Cook, Dinnen, Thompson, et al., 2015) | Clinician       | Positive view of prolonged exposure.                                                                                                                                                                               | -                                                                       | Positively related     | PTSD                          | Adults                 |
|             | (Cook, Dinnen, Thompson, et al., 2015) | Clinician       | Perceived risk or uncertainty of outcome associated with prolonged exposure.                                                                                                                                       | -                                                                       | Unrelated              | PTSD                          | Adults                 |
|             | (Cook, Thompson, & Schnurr, 2015)      | Clinician       | Perceived positive characteristics of prolonged exposure (e.g., relative advantage, compatibility, complexity, trialability, observability, potential for reinvention, task issues, knowledge, technical support). | -                                                                       | Positively related     | PTSD                          | Adults                 |
|             | (Cook, Thompson, &                     | Clinician       | Perceived positive characteristics of cognitive processing therapy (e.g., relative advantage, compatibility, complexity,                                                                                           | -                                                                       | Unrelated              | PTSD                          | Adults                 |

| TDF Domains | Study                          | Construct Focus | Constructs                                                                                                                                                                                                        | Notes                                                                                                                                                 | Relationship to ET Use | Presentation                  | Developmental Subgroup |
|-------------|--------------------------------|-----------------|-------------------------------------------------------------------------------------------------------------------------------------------------------------------------------------------------------------------|-------------------------------------------------------------------------------------------------------------------------------------------------------|------------------------|-------------------------------|------------------------|
|             | Schnurr, 2015)                 |                 | trialability, observability, potential for reinvention, task issues, knowledge, technical support).                                                                                                               |                                                                                                                                                       |                        |                               |                        |
|             | (Cook, Thompson, et al., 2020) | Clinician       | Perceived positive view of prolonged exposure (e.g., relative advantage, compatibility, complexity, trialability, observability, potential for reinvention, task issues, knowledge, technical support).           | -                                                                                                                                                     | Positively related     | PTSD                          | Adults                 |
|             | (Cook, Thompson, et al., 2020) | Clinician       | Perceived risk associated with prolonged exposure use.                                                                                                                                                            | -                                                                                                                                                     | Unrelated              | PTSD                          | Adults                 |
|             | (Cook, Thompson, et al., 2020) | Clinician       | Perceived positive view of cognitive processing therapy (e.g., relative advantage, compatibility, complexity, trialability, observability, potential for reinvention, task issues, knowledge, technical support). | -                                                                                                                                                     | Unrelated              | PTSD                          | Adults                 |
|             | (Cook, Thompson, et al., 2020) | Clinician       | Perceived risk associated with cognitive processing therapy.                                                                                                                                                      | -                                                                                                                                                     | Unrelated              | PTSD                          | Adults                 |
|             | (Deacon et al., 2013)          | Clinician       | Less change in negative beliefs about exposure therapy following single-day (seven-hour) didactic workshop on nature and use of exposure-based anxiety treatment.                                                 | -                                                                                                                                                     | Positively related     | Anxiety-related presentations | Lifespan               |
|             | (Deacon et al., 2013)          | Clinician       | Negative beliefs about exposure.                                                                                                                                                                                  | Negatively related to dichotomous exposure use in last year before single-day workshop, relative to non-use. Unrelated following single-day workshop. | Negatively related     | Anxiety-related presentations | Lifespan               |
|             | (de Jong et al., 2020)         | Clinician       | Negative beliefs about exposure therapy.                                                                                                                                                                          | -                                                                                                                                                     | Negatively related     | Anxiety-related presentations | Youth                  |



| TDF Domains | Study                        | Construct Focus | Constructs                                                                                                | Notes | Relationship to ET Use | Presentation                  | Developmental Subgroup |
|-------------|------------------------------|-----------------|-----------------------------------------------------------------------------------------------------------|-------|------------------------|-------------------------------|------------------------|
|             | (de Jong et al., 2020)       | Clinician       | Belief that exposure therapy places children at a greater risk of harm.                                   | -     | Negatively related     | Anxiety-related presentations | Youth                  |
|             | (de Jong et al., 2020)       | Clinician       | Belief that most children refuse to participate in exposure therapy.                                      | -     | Negatively related     | Anxiety-related presentations | Youth                  |
|             | (de Jong et al., 2020)       | Clinician       | Perceived utility of cognitive strategies in the exposure-based treatment of anxiety in youth.            | -     | Positively related     | Anxiety-related presentations | Youth                  |
|             | (de Jong et al., 2020)       | Clinician       | Perceived utility of relaxation strategies in the exposure-based treatment of anxiety in youth.           | -     | Unrelated              | Anxiety-related presentations | Youth                  |
|             | (Finley et al., 2015)        | Clinician       | Perceived effectiveness of prolonged exposure.                                                            | -     | Positively related     | PTSD                          | Adults                 |
|             | (Finley et al., 2015)        | Clinician       | Perceived effectiveness of cognitive processing therapy.                                                  | -     | Negatively related     | PTSD                          | Adults                 |
|             | (Harned et al., 2013)        | Clinician       | Negative attitudes towards exposure therapy.                                                              | -     | Unrelated              | Anxiety-related presentations | Lifespan               |
|             | (Harned et al., 2021)        | Clinician       | Belief about likelihood that patient problems will be worsened during or after exposure therapy for PTSD. | -     | Unrelated              | PTSD                          | Lifespan               |
|             | (Harned et al., 2021)        | Clinician       | Perceived usefulness of dialectical behaviour therapy prolonged exposure.                                 | -     | Positively related     | PTSD                          | Lifespan               |
|             | (Kannis-Dymand et al., 2022) | Clinician       | Negative beliefs about exposure.                                                                          | -     | Negatively related     | Anxiety disorders             | Lifespan               |
|             | (Keleher et al., 2020)       | Clinician       | Negative beliefs about exposure.                                                                          | -     | Negatively related     | OCD                           | Youth                  |

| TDF Domains | Study                | Construct Focus | Constructs                                                                               | Notes                                                                                                                                                          | Relationship to ET Use | Presentation                  | Developmental Subgroup |
|-------------|----------------------|-----------------|------------------------------------------------------------------------------------------|----------------------------------------------------------------------------------------------------------------------------------------------------------------|------------------------|-------------------------------|------------------------|
|             | (Klan et al., 2017)  | Client          | Treatment outcome expectancies.                                                          | -                                                                                                                                                              | Unrelated              | Anxiety disorders             | Adults                 |
|             | (Klan et al., 2017)  | Clinician       | Treatment outcome expectancies.                                                          | Unrelated to ET use or amount in a sample of treatment completers. In the intent to treat sample was positively related to ET use, but unrelated to ET amount. | Positively related     | Anxiety disorders             | Adults                 |
|             | (Meyer et al., 2020) | Clinician       | Beliefs that safety behaviours are helpful for a range of outcomes during exposure.      | -                                                                                                                                                              | Negatively related     | Anxiety-related presentations | Lifespan               |
|             | (Meyer et al., 2020) | Clinician       | Beliefs that safety behaviours protect the client during exposure.                       | -                                                                                                                                                              | Negatively related     | Anxiety-related presentations | Lifespan               |
|             | (Meyer et al., 2020) | Clinician       | Beliefs that safety behaviours uphold ethical and legal standards during exposure.       | -                                                                                                                                                              | Unrelated              | Anxiety-related presentations | Lifespan               |
|             | (Meyer et al., 2020) | Clinician       | Beliefs that safety behaviours help manage the therapist's own distress during exposure. | -                                                                                                                                                              | Unrelated              | Anxiety-related presentations | Lifespan               |
|             | (Meyer et al., 2020) | Clinician       | Negative beliefs about exposure.                                                         | -                                                                                                                                                              | Positively related     | Anxiety-related presentations | Lifespan               |
|             | (Moses et al., 2022) | Clinician       | Negative beliefs about exposure.                                                         | -                                                                                                                                                              | Negatively related     | Anxiety-related presentations | Lifespan               |
|             | (Moses et al., 2022) | Clinician       | Negative beliefs about exposure.                                                         | Negatively related to the use of exposure therapy for anxiety and interoceptive exposure for panic disorder.                                                   | Negatively related     | Anxiety disorders             | Lifespan               |

| TDF Domains | Study                   | Construct Focus | Constructs                                                      | Notes                                                                                  | Relationship to ET Use | Presentation                  | Developmental Subgroup |
|-------------|-------------------------|-----------------|-----------------------------------------------------------------|----------------------------------------------------------------------------------------|------------------------|-------------------------------|------------------------|
|             | (Moses et al., 2022)    | Clinician       | Negative beliefs about exposure.                                | -                                                                                      | Negatively related     | OCD                           | Lifespan               |
|             | (Moses et al., 2022)    | Clinician       | Negative beliefs about exposure.                                | -                                                                                      | Negatively related     | PTSD                          | Lifespan               |
|             | (Parker & Waller, 2019) | Clinician       | Negative attitudes towards cognitive-behavioural therapy.       | -                                                                                      | Unrelated              | Anxiety-related presentations | Lifespan               |
|             | (Pittig et al., 2019)   | Clinician       | Negative beliefs about exposure.                                | -                                                                                      | Negatively related     | Anxiety-related presentations | Lifespan               |
|             | (Reid et al., 2018)     | Clinician       | Negative beliefs about exposure.                                | -                                                                                      | Negatively related     | Anxiety disorders             | Youth                  |
|             | (Reid et al., 2018)     | Clinician       | Negative beliefs about exposure.                                | -                                                                                      | Negatively related     | OCD                           | Youth                  |
|             | (Reid et al., 2018)     | Clinician       | Negative beliefs about exposure.                                | -                                                                                      | Unrelated              | PTSD                          | Youth                  |
|             | (Rosen et al., 2017)    | Clinician       | Belief that prolonged exposure is effective.                    | -                                                                                      | Positively related     | PTSD                          | Adults                 |
|             | (Rosen et al., 2017)    | Clinician       | Belief that prolonged exposure is too time-consuming.           | -                                                                                      | Unrelated              | PTSD                          | Adults                 |
|             | (Rowe & Kangas, 2020)   | Clinician       | Negative beliefs about exposure.                                | Unrelated to frequency and in-session duration of use.                                 | Unrelated              | Anxiety-related presentations | Adults                 |
|             | (Ruzek et al., 2017)    | Clinician       | Belief that prolonged exposure helps patients.                  | Pre-training baseline levels positively related. Change throughout training unrelated. | Positively related     | PTSD                          | Adults                 |
|             | (Ruzek et al., 2017)    | Clinician       | Belief that prolonged exposure is time consuming for clinician. | Pre-training baseline levels negatively related. Change throughout training unrelated. | Negatively related     | PTSD                          | Adults                 |

| TDF Domains | Study                     | Construct Focus | Constructs                                                             | Notes                                                                                                                                                                                                                                                                                                                                                                                                                                                                                                                 | Relationship to ET Use | Presentation      | Developmental Subgroup |
|-------------|---------------------------|-----------------|------------------------------------------------------------------------|-----------------------------------------------------------------------------------------------------------------------------------------------------------------------------------------------------------------------------------------------------------------------------------------------------------------------------------------------------------------------------------------------------------------------------------------------------------------------------------------------------------------------|------------------------|-------------------|------------------------|
|             | (Ruzek et al., 2017)      | Clinician       | Belief that prolonged exposure may harm patients.                      | Pre-training baseline levels negatively related. Change throughout training unrelated.                                                                                                                                                                                                                                                                                                                                                                                                                                | Negatively related     | PTSD              | Adults                 |
|             | (Ruzek et al., 2017)      | Clinician       | Belief that prolonged exposure is emotionally demanding for clinician. | Pre-training baseline levels and change throughout training positively related.<br><br>Positively related to use of therapist-directed in vivo exposure, in vivo self-exposure, and exposure-based homework assignments for social anxiety. Unrelated to use of imaginal exposure, exposure and response prevention, and interoceptive exposure for social anxiety.                                                                                                                                                   | Positively related     | PTSD              | Adults                 |
|             | (Sars & van Minnen, 2015) | Clinician       | Perceived treatment credibility of exposure therapy.                   | Positively related to use of therapist-directed in vivo exposure, in vivo self-exposure, and exposure-based homework assignments for specific phobia. Unrelated to use of imaginal exposure, exposure and response prevention, and interoceptive exposure for specific phobia.<br><br>Positively related to use of therapist-directed in vivo exposure, in vivo self-exposure, interoceptive exposure, and exposure-based homework assignments for panic disorder. Unrelated to use of imaginal exposure and exposure | Positively related     | Anxiety disorders | Lifespan               |

| TDF Domains | Study                     | Construct Focus | Constructs                                                                                                                                                                  | Notes                                                                                                                                                                                                                                                                                                                                                                              | Relationship to ET Use | Presentation      | Developmental Subgroup |
|-------------|---------------------------|-----------------|-----------------------------------------------------------------------------------------------------------------------------------------------------------------------------|------------------------------------------------------------------------------------------------------------------------------------------------------------------------------------------------------------------------------------------------------------------------------------------------------------------------------------------------------------------------------------|------------------------|-------------------|------------------------|
|             |                           |                 |                                                                                                                                                                             | and response prevention for panic disorder.                                                                                                                                                                                                                                                                                                                                        |                        |                   |                        |
|             | (Sars & van Minnen, 2015) | Clinician       | Perceived treatment credibility of exposure therapy.                                                                                                                        | Positively related to use of therapist-directed in vivo exposure, in vivo self-exposure, exposure and response prevention, and exposure-based homework assignments.<br>Unrelated to use of imaginal exposure and interoceptive exposure.                                                                                                                                           | Positively related     | OCD               | Lifespan               |
|             | (Schumacher et al., 2018) | Clinician       | Negative beliefs about exposure.                                                                                                                                            | For panic disorder: Unrelated for being a user (in 1 – 80% of cases), relative to non-user. Negatively related for being a frequent user (in 81% or more of cases), relative to non-user.<br><br>For phobia: Unrelated for being a user (in 1 – 80% of cases), relative to non-user. Negatively related for being a frequent user (in 81% or more of cases), relative to non-user. | Negatively related     | Anxiety disorders | Lifespan               |
|             | (Schumacher et al., 2018) | Clinician       | Negative beliefs about exposure.                                                                                                                                            | Negatively related for being a user (in 1 – 80% of cases) and a frequent user (in 81% or more of cases), relative to non-users.                                                                                                                                                                                                                                                    | Negatively related     | PTSD              | Lifespan               |
|             | (van Minnen et al., 2010) | Clinician       | Perceived barriers to use of imaginal exposure (i.e., concerns about side effects, symptom exacerbation, perceived patient desire, treatment utility, and risk of dropout). | -                                                                                                                                                                                                                                                                                                                                                                                  | Unrelated              | PTSD              | Lifespan               |

| TDF Domains   | Study                                  | Construct Focus | Constructs                                                                                                                                                                                                                                                                                                                                                                                   | Notes | Relationship to ET Use | Presentation                  | Developmental Subgroup |
|---------------|----------------------------------------|-----------------|----------------------------------------------------------------------------------------------------------------------------------------------------------------------------------------------------------------------------------------------------------------------------------------------------------------------------------------------------------------------------------------------|-------|------------------------|-------------------------------|------------------------|
|               | (van Minnen et al., 2010)              | Clinician       | Perceived treatment credibility of imaginal exposure.                                                                                                                                                                                                                                                                                                                                        | -     | Positively related     | PTSD                          | Lifespan               |
|               | (Whiteside, Deacon, et al., 2016)      | Clinician       | Negative beliefs about exposure.                                                                                                                                                                                                                                                                                                                                                             | -     | Negatively related     | Anxiety-related presentations | Youth                  |
|               | (Živčić-Bećirević et al., 2019)        | Clinician       | Negative beliefs about exposure.                                                                                                                                                                                                                                                                                                                                                             | -     | Negatively related     | Anxiety-related presentations | Lifespan               |
| Reinforcement | -                                      | -               | -                                                                                                                                                                                                                                                                                                                                                                                            | -     | -                      | -                             | -                      |
| Intentions    | (Becker-Haimes et al., 2017)           | Clinician       | Openness to innovation.                                                                                                                                                                                                                                                                                                                                                                      | -     | Positively related     | Anxiety-related presentations | Youth                  |
|               | (Cook, Dinnen, Thompson, et al., 2015) | Clinician       | Drive to adopt prolonged exposure.                                                                                                                                                                                                                                                                                                                                                           | -     | Unrelated              | PTSD                          | Adults                 |
|               | (Cook, Dinnen, Thompson, et al., 2015) | Clinician       | Openness to prolonged exposure.                                                                                                                                                                                                                                                                                                                                                              | -     | Unrelated              | PTSD                          | Adults                 |
|               | (Harned et al., 2013)                  | Clinician       | Online training (10-hour online course) plus motivational enhancement (brief five-minute video and simulated discussion with a virtual exposure therapy consultant). Compared to only online training and online training, motivational enhancement, and an online learning community (eight one-hour learning community meetings facilitated by an experienced exposure therapy clinician). | -     | Unrelated              | Anxiety-related presentations | Lifespan               |

| TDF Domains | Study                     | Construct Focus | Constructs                                                                                                                                                                                                              | Notes                                                                                                                                                                                                                                                                        | Relationship to ET Use | Presentation                  | Developmental Subgroup |
|-------------|---------------------------|-----------------|-------------------------------------------------------------------------------------------------------------------------------------------------------------------------------------------------------------------------|------------------------------------------------------------------------------------------------------------------------------------------------------------------------------------------------------------------------------------------------------------------------------|------------------------|-------------------------------|------------------------|
|             | (Harned et al., 2011)     | Clinician       | Online training in exposure therapy combined with one to two motivational interviewing phone calls. Compared to online training in exposure therapy alone and online control training in dialectical behaviour therapy. | -                                                                                                                                                                                                                                                                            | Unrelated              | Anxiety-related presentations | Lifespan               |
|             | (Sars & van Minnen, 2015) | Clinician       | Willingness to apply exposure techniques.                                                                                                                                                                               | Positively related to use of therapist-directed in vivo exposure, in vivo self-exposure, and exposure-based homework assignments for social anxiety. Unrelated to use of imaginal exposure, exposure and response prevention, and interoceptive exposure for social anxiety. | Positively related     | Anxiety disorders             | Lifespan               |
|             |                           |                 |                                                                                                                                                                                                                         | Positively related to use of therapist-directed in vivo exposure, in vivo self-exposure, interoceptive exposure, and exposure-based homework assignments for panic disorder. Unrelated to use of imaginal exposure and exposure                                              |                        |                               |                        |

| TDF Domains | Study                          | Construct Focus | Constructs                                                                                                                    | Notes                                                                                                                                                                                                                                  | Relationship to ET Use | Presentation                  | Developmental Subgroup |
|-------------|--------------------------------|-----------------|-------------------------------------------------------------------------------------------------------------------------------|----------------------------------------------------------------------------------------------------------------------------------------------------------------------------------------------------------------------------------------|------------------------|-------------------------------|------------------------|
|             |                                |                 |                                                                                                                               | and response prevention for panic disorder.                                                                                                                                                                                            |                        |                               |                        |
|             | (Sars & van Minnen, 2015)      | Clinician       | Willingness to apply exposure techniques.                                                                                     | Positively related to use of therapist-directed in vivo exposure, exposure and response prevention, and exposure-based homework assignments. Unrelated to use of in vivo self-exposure, imaginal exposure, and interoceptive exposure. | Positively related     | OCD                           | Lifespan               |
| Goals       | (Becker-Haimes et al., 2017)   | Clinician       | Use of relaxation.                                                                                                            | -                                                                                                                                                                                                                                      | Negatively related     | Anxiety-related presentations | Youth                  |
|             | (Cook, Thompson, et al., 2020) | Clinician       | Use of cognitive processing therapy on an individual basis.                                                                   | -                                                                                                                                                                                                                                      | Unrelated              | PTSD                          | Adults                 |
|             | (Cook, Thompson, et al., 2020) | Clinician       | Use of cognitive processing therapy on a group basis.                                                                         | -                                                                                                                                                                                                                                      | Negatively related     | PTSD                          | Adults                 |
|             | (Meyer et al., 2020)           | Clinician       | Frequency of using therapist safety behaviours.                                                                               | -                                                                                                                                                                                                                                      | Negatively related     | Anxiety-related presentations | Lifespan               |
|             | (Meyer et al., 2020)           | Clinician       | Likelihood of excluding a client from exposure therapy due to client characteristics (e.g., comorbidity, insight, fragility). | -                                                                                                                                                                                                                                      | Negatively related     | Anxiety-related presentations | Lifespan               |



| TDF Domains | Study                     | Construct Focus | Constructs                                                                            | Notes                                                                                                                                                                                                                                                                          | Relationship to ET Use | Presentation      | Developmental Subgroup |
|-------------|---------------------------|-----------------|---------------------------------------------------------------------------------------|--------------------------------------------------------------------------------------------------------------------------------------------------------------------------------------------------------------------------------------------------------------------------------|------------------------|-------------------|------------------------|
|             | (Ruzek et al., 2017)      | Clinician       | Estimate of number of patients per week planning on treating with prolonged exposure. | -                                                                                                                                                                                                                                                                              | Positively related     | PTSD              | Adults                 |
|             | (Ruzek et al., 2017)      | Clinician       | Intent to use prolonged exposure following training and consultation.                 | -                                                                                                                                                                                                                                                                              | Positively related     | PTSD              | Adults                 |
|             | (Sars & van Minnen, 2015) | Clinician       | Personal preference for exposure.                                                     | Positively related to use of therapist-directed in vivo exposure, in vivo self-exposure, and exposure-based homework assignments for social anxiety. Unrelated to use of imaginal exposure, exposure and response prevention, and interoceptive exposure for social anxiety.   | Positively related     | Anxiety disorders | Lifespan               |
|             |                           |                 |                                                                                       | Positively related to use of therapist-directed in vivo exposure, in vivo self-exposure, and exposure-based homework assignments for specific phobia. Unrelated to use of imaginal exposure, exposure and response prevention, and interoceptive exposure for specific phobia. |                        |                   |                        |
|             |                           |                 |                                                                                       | Positively related to use of therapist-directed in vivo exposure, in vivo self-exposure, interoceptive exposure, and exposure-based homework assignments for panic disorder. Unrelated to use of imaginal exposure and exposure                                                |                        |                   |                        |

| TDF Domains | Study                                       | Construct Focus | Constructs                                                                                                                                                                                                                                                                                                                                                       | Notes                                                                                                                                                                                                                                                                                                                                                    | Relationship to ET Use | Presentation                  | Developmental Subgroup |
|-------------|---------------------------------------------|-----------------|------------------------------------------------------------------------------------------------------------------------------------------------------------------------------------------------------------------------------------------------------------------------------------------------------------------------------------------------------------------|----------------------------------------------------------------------------------------------------------------------------------------------------------------------------------------------------------------------------------------------------------------------------------------------------------------------------------------------------------|------------------------|-------------------------------|------------------------|
|             | (Sars & van Minnen, 2015)                   | Clinician       | Personal preference for exposure.                                                                                                                                                                                                                                                                                                                                | and response prevention for panic disorder.<br>Positively related to use of therapist-directed in vivo exposure, in vivo self-exposure, exposure and response prevention, and exposure-based homework assignments.<br>Unrelated to use of imaginal exposure and interoceptive exposure.                                                                  | Positively related     | OCD                           | Lifespan               |
|             | (Vande Voort et al., 2010)                  | Clinician       | Use of relaxation techniques.                                                                                                                                                                                                                                                                                                                                    | -                                                                                                                                                                                                                                                                                                                                                        | Unrelated              | Anxiety-related presentations | Youth                  |
|             | (Vande Voort et al., 2010)                  | Clinician       | Use of anxiety management techniques.                                                                                                                                                                                                                                                                                                                            | -                                                                                                                                                                                                                                                                                                                                                        | Negatively related     | Anxiety-related presentations | Youth                  |
|             | (Vande Voort et al., 2010)                  | Clinician       | Use of behaviour management techniques.                                                                                                                                                                                                                                                                                                                          | -                                                                                                                                                                                                                                                                                                                                                        | Unrelated              | Anxiety-related presentations | Youth                  |
|             | (Whiteside, Biggs, Ollendick, et al., 2022) | Clinician       | Allocation to a treatment condition delivering parent coached exposure therapy assisted by an application. Involved receiving 30- to 90-minutes of phone training around how to use the application. Relative to the treatment as usual condition, which received equivalent training in how to maintain their traditional treatment within the study framework. | Positively related to implementing all aspects of exposure (i.e., education, planning, and completing), including in orientation phase (exposure education and fear ladder building), and treatment phase (implementing overall, in vivo, and imaginal exposure). Positively related to percentage of sessions with some in-session or in vivo exposure. | Positively related     | Anxiety-related presentations | Youth                  |

| TDF Domains                               | Study                               | Construct Focus | Constructs                                                                                                                                                                                   | Notes | Relationship to ET Use | Presentation                  | Developmental Subgroup |
|-------------------------------------------|-------------------------------------|-----------------|----------------------------------------------------------------------------------------------------------------------------------------------------------------------------------------------|-------|------------------------|-------------------------------|------------------------|
| Memory, Attention, and Decision Processes | -                                   | -               | -                                                                                                                                                                                            | -     | -                      | -                             | -                      |
| Environmental Context and Resources       | (Becker-Haimes et al., 2020)        | System          | Organisational characteristics for supporting the use of exposure therapy.                                                                                                                   | -     | Unrelated              | Anxiety-related presentations | Lifespan               |
|                                           | (Becker-Haimes et al., 2017)        | Clinician       | Caseload.                                                                                                                                                                                    | -     | Negatively related     | Anxiety-related presentations | Youth                  |
|                                           | (Becker-Haimes et al., 2017)        | System          | Organisational climate of functionality (i.e., climates in which clinicians can get their job done effectively and have a well-defined understanding of how they fit into the organisation). | -     | Unrelated              | Anxiety-related presentations | Youth                  |
|                                           | (Becker-Haimes et al., 2017)        | System          | Organisational culture of proficiency (i.e., cultures in which clinicians prioritize the well-being of clients and place emphasis on clinicians being up to date with the latest evidence).  | -     | Unrelated              | Anxiety-related presentations | Youth                  |
|                                           | (Becker-Haimes et al., 2017)        | System          | Organisational culture of rigidity (i.e., cultures in which clinicians are expected to show little interest in new ways to provide services and suppress efforts for change).                | -     | Unrelated              | Anxiety-related presentations | Youth                  |
|                                           | (Becker-Haimes et al., 2017)        | System          | Number of therapists in organisation.                                                                                                                                                        | -     | Unrelated              | Anxiety-related presentations | Youth                  |
|                                           | (Cook, Dinnen, Coyne, et al., 2015) | Clinician       | Consistency of the innovation (prolonged exposure) with existing values, experiences, and needs of adopter and system.                                                                       | -     | Unrelated              | PTSD                          | Adults                 |

| TDF Domains | Study                                  | Construct Focus | Constructs                                                                                                                                                                       | Notes | Relationship to ET Use | Presentation | Developmental Subgroup |
|-------------|----------------------------------------|-----------------|----------------------------------------------------------------------------------------------------------------------------------------------------------------------------------|-------|------------------------|--------------|------------------------|
|             | (Cook, Dinnen, Coyne, et al., 2015)    | System          | Availability of means needed to implement the innovation (prolonged exposure; e.g., funding, time, access, administrative support).                                              | -     | Unrelated              | PTSD         | Adults                 |
|             | (Cook, Dinnen, Thompson, et al., 2015) | System          | Number of beds in residential treatment program.                                                                                                                                 | -     | Unrelated              | PTSD         | Adults                 |
|             | (Cook, Dinnen, Thompson, et al., 2015) | System          | Average length of patient stay in residential treatment program.                                                                                                                 | -     | Unrelated              | PTSD         | Adults                 |
|             | (Cook, Dinnen, Thompson, et al., 2015) | System          | Structural context of risk-taking climate, managerial relations, goals and priorities, leadership and vision, high quality data capture, and enabling of knowledge sharing.      | -     | Unrelated              | PTSD         | Adults                 |
|             | (Cook, Dinnen, Thompson, et al., 2015) | System          | Supportive context including dedicated time and resources, and incentives and mandates.                                                                                          | -     | Positively related     | PTSD         | Adults                 |
|             | (Cook, Simiola, et al., 2020)          | System          | Changes to core members of team (i.e., staff turnover).                                                                                                                          | -     | Negatively related     | PTSD         | Adults                 |
|             | (Cook, Simiola, et al., 2020)          | System          | Program director encourages staff to implement evidence-based practices (i.e., cognitive processing therapy or prolonged exposure) and provides time and resources for adoption. | -     | Unrelated              | PTSD         | Adults                 |
|             | (Cook, Thompson, et al., 2020)         | System          | Number of beds in residential treatment program.                                                                                                                                 | -     | Unrelated              | PTSD         | Adults                 |

| TDF Domains | Study                          | Construct Focus | Constructs                                                                                                      | Notes | Relationship to ET Use | Presentation                  | Developmental Subgroup |
|-------------|--------------------------------|-----------------|-----------------------------------------------------------------------------------------------------------------|-------|------------------------|-------------------------------|------------------------|
|             | (Cook, Thompson, et al., 2020) | System          | Average length of stay in residential treatment program.                                                        | -     | Unrelated              | PTSD                          | Adults                 |
|             | (de Jong et al., 2020)         | Clinician       | Caseload.                                                                                                       | -     | Unrelated              | Anxiety-related presentations | Youth                  |
|             | (Finley et al., 2015)          | Clinician       | Perception of clinical workload as too much.                                                                    | -     | Unrelated              | PTSD                          | Adults                 |
|             | (Finley et al., 2015)          | System          | Perception that clinic is understaffed.                                                                         | -     | Unrelated              | PTSD                          | Adults                 |
|             | (Harned et al., 2013)          | System          | The extent to which common organizational barriers interfered with ability to learn and apply exposure therapy. | -     | Unrelated              | Anxiety-related presentations | Lifespan               |
|             | (Harned et al., 2013)          | Clinician       | Primary work setting (i.e., private practice, outpatient, or non-outpatient).                                   | -     | Unrelated              | Anxiety-related presentations | Lifespan               |
|             | (Harned et al., 2013)          | Clinician       | Perceived interference of high client caseload on ability to learn and apply exposure therapy.                  | -     | Unrelated              | Anxiety-related presentations | Lifespan               |
|             | (Harned et al., 2013)          | Clinician       | Perceived interference of lack of anxiety disorder clients on ability to learn and apply exposure therapy.      | -     | Unrelated              | Anxiety-related presentations | Lifespan               |
|             | (Harned et al., 2013)          | Clinician       | Perceived interference of client's resistance to change on ability to learn and apply exposure therapy.         | -     | Unrelated              | Anxiety-related presentations | Lifespan               |
|             | (Klan et al., 2017)            | Client          | Axis I comorbidity.                                                                                             | -     | Unrelated              | Anxiety disorders             | Adults                 |
|             | (Maguen et al., 2019)          | Client          | Residence as rural (relative to urban).                                                                         | -     | Negatively related     | PTSD                          | Adults                 |

| TDF Domains | Study                 | Construct Focus | Constructs                                      | Notes | Relationship to ET Use | Presentation | Developmental Subgroup |
|-------------|-----------------------|-----------------|-------------------------------------------------|-------|------------------------|--------------|------------------------|
|             | (Maguen et al., 2019) | Client          | Residence as highly rural (relative to urban).  | -     | Unrelated              | PTSD         | Adults                 |
|             | (Maguen et al., 2019) | Client          | Having had military sexual trauma.              | -     | Positively related     | PTSD         | Adults                 |
|             | (Maguen et al., 2019) | Client          | Having recently smoked.                         | -     | Negatively related     | PTSD         | Adults                 |
|             | (Maguen et al., 2019) | Client          | On medication for PTSD.                         | -     | Positively related     | PTSD         | Adults                 |
|             | (Maguen et al., 2019) | Client          | Number of comorbidities.                        | -     | Positively related     | PTSD         | Adults                 |
|             | (Maguen et al., 2019) | Client          | Having a comorbidity of schizophrenia.          | -     | Negatively related     | PTSD         | Adults                 |
|             | (Maguen et al., 2019) | Client          | Having a comorbidity of bipolar.                | -     | Negatively related     | PTSD         | Adults                 |
|             | (Maguen et al., 2019) | Client          | Having a comorbidity of psychosis.              | -     | Unrelated              | PTSD         | Adults                 |
|             | (Maguen et al., 2019) | Client          | Having a comorbidity of pain.                   | -     | Positively related     | PTSD         | Adults                 |
|             | (Maguen et al., 2019) | Client          | Having a comorbidity of traumatic brain injury. | -     | Positively related     | PTSD         | Adults                 |
|             | (Maguen et al., 2019) | Client          | Having a comorbidity of depression.             | -     | Positively related     | PTSD         | Adults                 |
|             | (Maguen et al., 2019) | Client          | Having a comorbidity of alcohol abuse.          | -     | Positively related     | PTSD         | Adults                 |
|             | (Maguen et al., 2019) | Client          | Having a comorbidity of alcohol dependence.     | -     | Positively related     | PTSD         | Adults                 |
|             | (Maguen et al., 2019) | Client          | Having a comorbidity of drug abuse.             | -     | Unrelated              | PTSD         | Adults                 |

| TDF Domains | Study                 | Construct Focus | Constructs                                                                                                       | Notes                                                                                                                                                                          | Relationship to ET Use | Presentation                  | Developmental Subgroup |
|-------------|-----------------------|-----------------|------------------------------------------------------------------------------------------------------------------|--------------------------------------------------------------------------------------------------------------------------------------------------------------------------------|------------------------|-------------------------------|------------------------|
|             | (Maguen et al., 2019) | Client          | Having a comorbidity of drug dependence.                                                                         | -                                                                                                                                                                              | Unrelated              | PTSD                          | Adults                 |
|             | (Maguen et al., 2019) | Client          | Having a comorbidity of suicide ideation or attempt.                                                             | -                                                                                                                                                                              | Positively related     | PTSD                          | Adults                 |
|             | (Maguen et al., 2019) | Client          | Year of first mental health visit to the Veterans Health Administration as 2006 to 2017 (relative to 2001-2005). | -                                                                                                                                                                              | Positively related     | PTSD                          | Adults                 |
|             | (Maguen et al., 2019) | Client          | Number of non-evidence-based therapy sessions received by client before first session of prolonged exposure.     | Positively related when both including and excluding clients who received no sessions of non-evidence-based therapy.                                                           | Positively related     | PTSD                          | Adults                 |
|             | (Maguen et al., 2019) | Client          | Presentation is service connected.                                                                               | -                                                                                                                                                                              | Positively related     | PTSD                          | Adults                 |
|             | (Moses et al., 2022)  | Client          | Presentation categorised as OCD (relative to anxiety and PTSD) or anxiety (relative to PTSD).                    | Exposure and response prevention greatest for OCD, then anxiety, and then PTSD. No difference on self-directed in vivo, therapist-assisted in vivo, or interoceptive exposure. | Positively related     | Anxiety-related presentations | Lifespan               |
|             | (Moses et al., 2022)  | Client          | Presentation categorised as anxiety, OCD, or PTSD.                                                               | No difference on self-directed in vivo, therapist-assisted in vivo, or interoceptive exposure.                                                                                 | Unrelated              | Anxiety-related presentations | Lifespan               |
|             | (Moses et al., 2021)  | Client          | Presentation categorised as PTSD (relative to anxiety and OCD).                                                  | Imaginal exposure greater for PTSD than anxiety and OCD.                                                                                                                       | Positively related     | Anxiety-related presentations | Lifespan               |
|             | (Moses et al., 2021)  | Clinician       | Frequency of working with clients with anxiety, OCD, and PTSD.                                                   | Unrelated to general exposure and exposure and response prevention use.                                                                                                        | Unrelated              | OCD                           | Lifespan               |
|             | (Moses et al., 2021)  | Clinician       | Frequency of working with clients with anxiety, OCD, and PTSD.                                                   | Positively related to general exposure use. Unrelated to imaginal exposure use.                                                                                                | Positively related     | PTSD                          | Lifespan               |

| TDF Domains | Study                   | Construct Focus | Constructs                                                                  | Notes                                                                                                                     | Relationship to ET Use | Presentation                  | Developmental Subgroup |
|-------------|-------------------------|-----------------|-----------------------------------------------------------------------------|---------------------------------------------------------------------------------------------------------------------------|------------------------|-------------------------------|------------------------|
|             | (Moses et al., 2021)    | Clinician       | Frequency of working with clients with anxiety, OCD, and PTSD.              | Positively related to general, imaginal, and interoceptive exposure use.                                                  | Positively related     | Anxiety disorders             | Lifespan               |
|             | (Parker & Waller, 2019) | Clinician       | Hours worked per week.                                                      | -                                                                                                                         | Unrelated              | Anxiety-related presentations | Lifespan               |
|             | (Parker & Waller, 2019) | Clinician       | Average number of sessions when treating a client with an anxiety disorder. | -                                                                                                                         | Unrelated              | Anxiety-related presentations | Lifespan               |
|             | (Parker & Waller, 2019) | Clinician       | Hours spent with clients with anxiety disorders per week.                   | -                                                                                                                         | Unrelated              | Anxiety-related presentations | Lifespan               |
|             | (Pittig et al., 2019)   | Clinician       | Perceived practicability barriers for conducting exposure.                  | -                                                                                                                         | Negatively related     | Anxiety-related presentations | Lifespan               |
|             | (Rosen et al., 2019)    | Client          | Distance from home to nearest Veterans Affairs clinic.                      | Negatively related, relative to other psychotherapies – but unrelated relative to cognitive processing therapy.           | Negatively related     | PTSD                          | Adults                 |
|             | (Rosen et al., 2019)    | Client          | Number of co-occurring psychiatric diagnoses.                               | Negatively related, relative to other psychotherapies – but unrelated relative to cognitive processing therapy.           | Negatively related     | PTSD                          | Adults                 |
|             | (Rosen et al., 2019)    | Client          | Residence categorised as urban (relative to rural).                         | Positively related, relative to cognitive processing therapy – but negatively related, relative to other psychotherapies. | Related                | PTSD                          | Adults                 |
|             | (Rosen et al., 2019)    | Client          | Hospitalisation in last year for psychiatric treatment.                     | -                                                                                                                         | Unrelated              | PTSD                          | Adults                 |



| TDF Domains | Study                | Construct Focus | Constructs                                                                                                      | Notes                                                                                                           | Relationship to ET Use | Presentation | Developmental Subgroup |
|-------------|----------------------|-----------------|-----------------------------------------------------------------------------------------------------------------|-----------------------------------------------------------------------------------------------------------------|------------------------|--------------|------------------------|
|             | (Rosen et al., 2019) | Client          | Hospitalisation in last year for substance use treatment.                                                       | -                                                                                                               | Unrelated              | PTSD         | Adults                 |
|             | (Rosen et al., 2019) | Client          | Having Veteran Affairs service-connected disability for PTSD.                                                   | Negatively related, relative to other psychotherapies – but unrelated relative to cognitive processing therapy. | Negatively related     | PTSD         | Adults                 |
|             | (Rosen et al., 2017) | Clinician       | Number of PTSD patients per week.                                                                               | -                                                                                                               | Positively related     | PTSD         | Adults                 |
|             | (Rosen et al., 2017) | Clinician       | Patient panel size.                                                                                             | -                                                                                                               | Unrelated              | PTSD         | Adults                 |
|             | (Rosen et al., 2017) | Clinician       | Proportion of PTSD patients seen weekly.                                                                        | -                                                                                                               | Positively related     | PTSD         | Adults                 |
|             | (Rosen et al., 2017) | System          | Flow of interested patients.                                                                                    | -                                                                                                               | Positively related     | PTSD         | Adults                 |
|             | (Rosen et al., 2017) | Clinician       | More common delivery of group (relative to individual) therapy.                                                 | -                                                                                                               | Negatively related     | PTSD         | Adults                 |
|             | (Rosen et al., 2017) | System          | Clinic type as a PTSD outpatient clinic (relative to clinics that are not PTSD speciality programs).            | -                                                                                                               | Positively related     | PTSD         | Adults                 |
|             | (Rosen et al., 2017) | System          | Clinic type as a PTSD residential or day treatment (relative to clinics that are not PTSD speciality programs). | -                                                                                                               | Unrelated              | PTSD         | Adults                 |
|             | (Ruzek et al., 2017) | Clinician       | Total patient caseload.                                                                                         | -                                                                                                               | Positively related     | PTSD         | Adults                 |
|             | (Ruzek et al., 2017) | Clinician       | PTSD clients per week.                                                                                          | -                                                                                                               | Positively related     | PTSD         | Adults                 |
|             | (Ruzek et al., 2017) | System          | Working in a PTSD speciality clinic.                                                                            | -                                                                                                               | Positively related     | PTSD         | Adults                 |

| TDF Domains | Study                     | Construct Focus | Constructs                                       | Notes                                                                                                                                                                                                                                                                         | Relationship to ET Use | Presentation      | Developmental Subgroup |
|-------------|---------------------------|-----------------|--------------------------------------------------|-------------------------------------------------------------------------------------------------------------------------------------------------------------------------------------------------------------------------------------------------------------------------------|------------------------|-------------------|------------------------|
|             |                           |                 |                                                  | Positively related to use of therapist-directed in vivo exposure and in vivo self-exposure for social anxiety. Unrelated to use of imaginal exposure, exposure and response prevention, interoceptive exposure, and exposure-based homework assignments for social anxiety.   |                        |                   |                        |
|             | (Sars & van Minnen, 2015) | Clinician       | Proportion of caseload with an anxiety disorder. | Positively related to use of therapist-directed in vivo exposure and in vivo self-exposure for specific phobia. Unrelated to use of imaginal exposure, exposure and response prevention, interoceptive exposure, and exposure-based homework assignments for specific phobia. | Positively related     | Anxiety disorders | Lifespan               |
|             |                           |                 |                                                  | Unrelated to use of therapist-directed in vivo exposure, in vivo self-exposure, imaginal exposure, exposure and response prevention, interoceptive exposure, and exposure-based homework assignments for panic disorder.                                                      |                        |                   |                        |
|             | (Sars & van Minnen, 2015) | Clinician       | Proportion of caseload with an anxiety disorder. | Positively related to use of therapist-directed in vivo exposure. Unrelated to use of in vivo self-exposure, imaginal exposure, exposure and response prevention, interoceptive exposure, and                                                                                 | Positively related     | OCD               | Lifespan               |

| TDF Domains | Study                     | Construct Focus | Constructs                                                       | Notes                                                                                                                                                                                                                                                                                                                                                                                                                                                                                                                                                                                                                                                                                                                                                                                                                                                                                         | Relationship to ET Use | Presentation      | Developmental Subgroup |
|-------------|---------------------------|-----------------|------------------------------------------------------------------|-----------------------------------------------------------------------------------------------------------------------------------------------------------------------------------------------------------------------------------------------------------------------------------------------------------------------------------------------------------------------------------------------------------------------------------------------------------------------------------------------------------------------------------------------------------------------------------------------------------------------------------------------------------------------------------------------------------------------------------------------------------------------------------------------------------------------------------------------------------------------------------------------|------------------------|-------------------|------------------------|
|             |                           |                 |                                                                  | <p>exposure-based homework assignments.</p> <p>Negatively related to use of therapist-directed in vivo exposure for social anxiety. Unrelated to use of in vivo self-exposure, imaginal exposure, exposure and response prevention, interoceptive exposure, and exposure-based homework assignments for social anxiety.</p> <p>Negatively related to use of therapist-directed in vivo exposure for specific phobia. Unrelated to use of in vivo self-exposure, imaginal exposure, exposure and response prevention, interoceptive exposure, and exposure-based homework assignments for specific phobia.</p> <p>Negatively related to use of therapist-directed in vivo exposure for panic disorder. Unrelated to use of in vivo self-exposure, imaginal exposure, exposure and response prevention, interoceptive exposure, and exposure-based homework assignments for panic disorder.</p> |                        |                   |                        |
|             | (Sars & van Minnen, 2015) | System          | Perceived practical limitations to use of exposure in workplace. |                                                                                                                                                                                                                                                                                                                                                                                                                                                                                                                                                                                                                                                                                                                                                                                                                                                                                               | Negatively related     | Anxiety disorders | Lifespan               |
|             | (Sars & van Minnen, 2015) | System          | Perceived practical limitations to use of exposure in workplace. |                                                                                                                                                                                                                                                                                                                                                                                                                                                                                                                                                                                                                                                                                                                                                                                                                                                                                               | Negatively related     | OCD               | Lifespan               |

| TDF Domains | Study                              | Construct Focus | Constructs                                                                                                                                                                                                                  | Notes                                                                                                                                                           | Relationship to ET Use | Presentation                  | Developmental Subgroup |
|-------------|------------------------------------|-----------------|-----------------------------------------------------------------------------------------------------------------------------------------------------------------------------------------------------------------------------|-----------------------------------------------------------------------------------------------------------------------------------------------------------------|------------------------|-------------------------------|------------------------|
|             |                                    |                 |                                                                                                                                                                                                                             | exposure and response prevention, interoceptive exposure, and exposure-based homework assignments.                                                              |                        |                               |                        |
|             | (Vande Voort et al., 2010)         | Client          | Pre- to post-treatment improved change in impact of anxiety on child and parent's daily functioning.                                                                                                                        | -                                                                                                                                                               | Positively related     | Anxiety-related presentations | Youth                  |
|             | (Vande Voort et al., 2010)         | Client          | Initial impact of anxiety on child and parent's daily functioning.                                                                                                                                                          | -                                                                                                                                                               | Unrelated              | Anxiety-related presentations | Youth                  |
|             | (Whiteside, Sattler, et al., 2016) | Client          | Anxiety diagnosis as the primary presentation (relative to a comorbid presentation).                                                                                                                                        | -                                                                                                                                                               | Positively related     | Anxiety-related presentations | Youth                  |
|             | (Whiteside, Sattler, et al., 2016) | Client          | Anxiety diagnosis, as OCD, social phobia, or specific phobia (compared to not present for each).                                                                                                                            | Diagnoses of general anxiety disorder or overanxious disorder, panic disorder with or without agoraphobia, separation anxiety disorder, or PTSD were unrelated. | Positively related     | Anxiety-related presentations | Youth                  |
|             | (Whiteside, Sattler, et al., 2016) | System          | Clinic specialisation as a childhood anxiety disorders speciality clinic (compared to both primary care clinic and general mental health clinic).                                                                           | -                                                                                                                                                               | Positively related     | Anxiety-related presentations | Youth                  |
|             | (Whiteside et al., 2023)           | System          | Working in an integrated behavioural health setting (usually as part of a multi-disciplinary team with greater focus on continual training and efficiency), relative to a traditional setting (i.e., primary care clinics). | In relation to self-reported exposure use.                                                                                                                      | Positively related     | Anxiety disorders             | Youth                  |
|             | (Whiteside et al., 2023)           | System          | Working in an integrated behavioural health setting (usually as part of a multi-disciplinary team with greater focus on continual training                                                                                  | In relation to coded exposure use via session audio recordings.                                                                                                 | Unrelated              | Anxiety disorders             | Youth                  |

| TDF Domains       | Study                                  | Construct Focus | Constructs                                                                                                                      | Notes | Relationship to ET Use | Presentation                  | Developmental Subgroup |
|-------------------|----------------------------------------|-----------------|---------------------------------------------------------------------------------------------------------------------------------|-------|------------------------|-------------------------------|------------------------|
|                   |                                        |                 | and efficiency), relative to a traditional setting (i.e., primary care clinics).                                                |       |                        |                               |                        |
| Social Influences | (Becker-Haimes et al., 2017)           | System          | Organisational implementation culture.                                                                                          | -     | Positively related     | Anxiety-related presentations | Youth                  |
|                   | (Cook, Dinnen, Coyne, et al., 2015)    | System          | Style of leadership with identified and articulated trajectory toward implementation of the innovation (prolonged exposure).    | -     | Positively related     | PTSD                          | Adults                 |
|                   | (Cook, Dinnen, Coyne, et al., 2015)    | Clinician       | The structure and quality of the therapist's social network, both formal and informal.                                          | -     | Unrelated              | PTSD                          | Adults                 |
|                   | (Cook, Dinnen, Thompson, et al., 2015) | Clinician       | Quality and influence of social network relating to prolonged exposure.                                                         | -     | Unrelated              | PTSD                          | Adults                 |
|                   | (Cook, Simiola, et al., 2020)          | System          | Program prioritising another treatment over cognitive processing therapy.                                                       | -     | Unrelated              | PTSD                          | Adults                 |
|                   | (Cook, Simiola, et al., 2020)          | System          | Program prioritising cognitive processing therapy over prolonged exposure.                                                      | -     | Unrelated              | PTSD                          | Adults                 |
|                   | (Finley et al., 2015)                  | System          | Perception that organizational politics negatively impacts work.                                                                | -     | Unrelated              | PTSD                          | Adults                 |
|                   | (Finley et al., 2015)                  | System          | Perception of fair treatment by superiors.                                                                                      | -     | Unrelated              | PTSD                          | Adults                 |
|                   | (Foa et al., 2020)                     | System          | Addition of one-hour weekly telephone consultation with prolonged exposure expert over the course of two client cases, relative | -     | Positively related     | PTSD                          | Adults                 |

| TDF Domains | Study                  | Construct Focus    | Constructs                                                                                                                                                                                                                                                                                                                                                                                       | Notes                                                    | Relationship to ET Use | Presentation                  | Developmental Subgroup |
|-------------|------------------------|--------------------|--------------------------------------------------------------------------------------------------------------------------------------------------------------------------------------------------------------------------------------------------------------------------------------------------------------------------------------------------------------------------------------------------|----------------------------------------------------------|------------------------|-------------------------------|------------------------|
|             |                        |                    | to just a four-day prolonged exposure workshop.                                                                                                                                                                                                                                                                                                                                                  |                                                          |                        |                               |                        |
|             | (Harned et al., 2013)  | System             | Online training (10-hour online course), motivational enhancement (brief five-minute video and simulated discussion with a virtual exposure therapy consultant), and an online learning community (eight one-hour learning community meetings facilitated by an experienced exposure therapy clinician). Compared to only online training and online training plus motivational enhancement.     | -                                                        | Unrelated              | Anxiety-related presentations | Lifespan               |
|             | (Harned et al., 2014)  | System             | Addition of a learning community (eight expert-facilitated one-hour community video-conference meetings over 12 weeks) on top of online training on exposure therapy consisting of didactic instruction and simulated clinical scenarios and a motivational enhancement (a video and simulated online conversation with an expert) aimed at addressing attitudinal barriers to exposure therapy. | -                                                        | Unrelated              | Anxiety-related presentations | Lifespan               |
|             | (Keleher et al., 2020) | System             | Amount of supervision received per month.                                                                                                                                                                                                                                                                                                                                                        | -                                                        | Unrelated              | OCD                           | Youth                  |
|             | (Klan et al., 2017)    | Clinician / Client | Therapeutic process including alliance rated by both therapist and client.                                                                                                                                                                                                                                                                                                                       | -                                                        | Unrelated              | Anxiety disorders             | Adults                 |
|             | (Moses et al., 2022)   | System             | Supervisor's recommendation to use exposure therapy, relative to no.                                                                                                                                                                                                                                                                                                                             | -                                                        | Unrelated              | Anxiety-related presentations | Lifespan               |
|             | (Moses et al., 2022)   | System             | Supervisor's recommendation to use exposure therapy, relative to no.                                                                                                                                                                                                                                                                                                                             | Unrelated to the use of exposure therapy for anxiety and | Unrelated              | Anxiety disorders             | Lifespan               |

| TDF Domains | Study                        | Construct Focus | Constructs                                                           | Notes                                                  | Relationship to ET Use | Presentation                  | Developmental Subgroup |
|-------------|------------------------------|-----------------|----------------------------------------------------------------------|--------------------------------------------------------|------------------------|-------------------------------|------------------------|
|             |                              |                 |                                                                      | interoceptive exposure for panic disorder.             |                        |                               |                        |
|             | (Moses et al., 2022)         | System          | Supervisor's recommendation to use exposure therapy, relative to no. | -                                                      | Unrelated              | OCD                           | Lifespan               |
|             | (Moses et al., 2022)         | System          | Supervisor's recommendation to use exposure therapy, relative to no. | -                                                      | Unrelated              | PTSD                          | Lifespan               |
|             | (Parker & Waller, 2019)      | System          | Hours of supervision given or received per month.                    | -                                                      | Unrelated              | Anxiety-related presentations | Lifespan               |
|             | (Rowe & Kangas, 2020)        | Clinician       | Secure attachment style.                                             | Unrelated to frequency and in-session duration of use. | Unrelated              | Anxiety-related presentations | Adults                 |
|             | (Rowe & Kangas, 2020)        | Clinician       | Preoccupied (anxious) attachment style.                              | Unrelated to frequency and in-session duration of use. | Unrelated              | Anxiety-related presentations | Adults                 |
|             | (Rowe & Kangas, 2020)        | Clinician       | Dismissing (avoidant) attachment style.                              | Unrelated to frequency and in-session duration of use. | Unrelated              | Anxiety-related presentations | Adults                 |
|             | (Rowe & Kangas, 2020)        | Clinician       | Fearful attachment style.                                            | Unrelated to frequency and in-session duration of use. | Unrelated              | Anxiety-related presentations | Adults                 |
| Emotion     | (Becker-Haimes et al., 2017) | Clinician       | Perceived intuitive appeal of evidence-based practice.               | -                                                      | Unrelated              | Anxiety-related presentations | Youth                  |
|             | (de Jong et al., 2020)       | Clinician       | Depressive symptoms.                                                 | -                                                      | Unrelated              | Anxiety-related presentations | Youth                  |
|             | (de Jong et al., 2020)       | Clinician       | Anxiety symptoms.                                                    | -                                                      | Unrelated              | Anxiety-related presentations | Youth                  |

| TDF Domains | Study                   | Construct Focus | Constructs                                                              | Notes                                                                         | Relationship to ET Use | Presentation                  | Developmental Subgroup |
|-------------|-------------------------|-----------------|-------------------------------------------------------------------------|-------------------------------------------------------------------------------|------------------------|-------------------------------|------------------------|
|             | (de Jong et al., 2020)  | Clinician       | Stress symptoms.                                                        | -                                                                             | Unrelated              | Anxiety-related presentations | Youth                  |
|             | (Harned et al., 2013)   | Clinician       | Anxiety sensitivity.                                                    | -                                                                             | Unrelated              | Anxiety-related presentations | Lifespan               |
|             | (Klan et al., 2017)     | Client          | Self-reported cognitions around agoraphobia.                            | -                                                                             | Unrelated              | Anxiety disorders             | Adults                 |
|             | (Klan et al., 2017)     | Client          | Self-reported bodily sensations involved in panic disorder/agoraphobia. | -                                                                             | Unrelated              | Anxiety disorders             | Adults                 |
|             | (Klan et al., 2017)     | Client          | Self-reported agoraphobia avoidance when alone and with another person. | -                                                                             | Unrelated              | Anxiety disorders             | Adults                 |
|             | (Klan et al., 2017)     | Client          | Self-reported anxiety.                                                  | -                                                                             | Unrelated              | Anxiety disorders             | Adults                 |
|             | (Klan et al., 2017)     | Client          | Self-reported phobic anxiety.                                           | Unrelated overall. Positively related in a subsample of treatment completers. | Positively related     | Anxiety disorders             | Adults                 |
|             | (Klan et al., 2017)     | Client          | Self-reported depressive symptoms.                                      | -                                                                             | Unrelated              | Anxiety disorders             | Adults                 |
|             | (Klan et al., 2017)     | Client          | Self-reported psychological distress.                                   | -                                                                             | Unrelated              | Anxiety disorders             | Adults                 |
|             | (Klan et al., 2017)     | Client          | Perceived client psychosocial stress rated by therapist.                | -                                                                             | Unrelated              | Anxiety disorders             | Adults                 |
|             | (Parker & Waller, 2019) | Clinician       | Prospective anxiety.                                                    | -                                                                             | Unrelated              | Anxiety-related presentations | Lifespan               |
|             | (Parker & Waller, 2019) | Clinician       | Inhibitory anxiety.                                                     | -                                                                             | Negatively related     | Anxiety-related presentations | Lifespan               |



| TDF Domains | Study                     | Construct Focus | Constructs                     | Notes                                                                                               | Relationship to ET Use | Presentation                  | Developmental Subgroup |
|-------------|---------------------------|-----------------|--------------------------------|-----------------------------------------------------------------------------------------------------|------------------------|-------------------------------|------------------------|
|             | (Pittig et al., 2019)     | Clinician       | Distress around exposure.      | -                                                                                                   | Negatively related     | Anxiety-related presentations | Lifespan               |
|             | (Moses et al., 2022)      | Clinician       | Worry or generalised anxiety.  | -                                                                                                   | Unrelated              | Anxiety-related presentations | Lifespan               |
|             | (Moses et al., 2022)      | Clinician       | Worry or generalised anxiety.  | Unrelated to the use of exposure therapy for anxiety and interoceptive exposure for panic disorder. | Unrelated              | Anxiety disorders             | Lifespan               |
|             | (Moses et al., 2022)      | Clinician       | Worry or generalised anxiety.  | -                                                                                                   | Unrelated              | OCD                           | Lifespan               |
|             | (Moses et al., 2022)      | Clinician       | Worry or generalised anxiety.  | -                                                                                                   | Unrelated              | PTSD                          | Lifespan               |
|             | (Reid et al., 2018)       | Clinician       | Disgust sensitivity.           | -                                                                                                   | Unrelated              | Anxiety disorders             | Youth                  |
|             | (Reid et al., 2018)       | Clinician       | Disgust sensitivity.           | -                                                                                                   | Unrelated              | OCD                           | Youth                  |
|             | (Reid et al., 2018)       | Clinician       | Disgust sensitivity.           | -                                                                                                   | Unrelated              | PTSD                          | Youth                  |
|             | (Reid et al., 2018)       | Clinician       | Anxiety sensitivity.           | -                                                                                                   | Unrelated              | Anxiety disorders             | Youth                  |
|             | (Reid et al., 2018)       | Clinician       | Anxiety sensitivity.           | -                                                                                                   | Unrelated              | OCD                           | Youth                  |
|             | (Reid et al., 2018)       | Clinician       | Anxiety sensitivity.           | -                                                                                                   | Unrelated              | PTSD                          | Youth                  |
|             | (Sars & van Minnen, 2015) | Clinician       | Fearful avoidance of exposure. | Unrelated to use of therapist-directed in vivo exposure, in vivo self-exposure, imaginal exposure,  | Negatively related     | Anxiety disorders             | Lifespan               |

| TDF Domains | Study                     | Construct Focus | Constructs                     | Notes                                                                                                                                                                                                                                                                         | Relationship to ET Use | Presentation | Developmental Subgroup |
|-------------|---------------------------|-----------------|--------------------------------|-------------------------------------------------------------------------------------------------------------------------------------------------------------------------------------------------------------------------------------------------------------------------------|------------------------|--------------|------------------------|
|             |                           |                 |                                | exposure and response prevention, interoceptive exposure, and exposure-based homework assignments for social anxiety.                                                                                                                                                         |                        |              |                        |
|             |                           |                 |                                | Negatively related to use of in vivo self-exposure and exposure-based homework assignments for specific phobia. Unrelated to use of therapist-directed in vivo exposure, imaginal exposure, exposure and response prevention, and interoceptive exposure for specific phobia. |                        |              |                        |
|             |                           |                 |                                | Negatively related to use of therapist-directed in vivo exposure for panic disorder. Unrelated to use of in vivo self-exposure, imaginal exposure, exposure and response prevention, interoceptive exposure, and exposure-based homework assignments for panic disorder.      |                        |              |                        |
|             | (Sars & van Minnen, 2015) | Clinician       | Fearful avoidance of exposure. | Negatively related to use of therapist-directed in vivo exposure. Unrelated to use of in vivo self-exposure, imaginal exposure, exposure and response prevention, interoceptive exposure, and exposure-based homework assignments.                                            | Negatively related     | OCD          | Lifespan               |

| TDF Domains            | Study                          | Construct Focus | Constructs                                                                                                                                                                                    | Notes | Relationship to ET Use | Presentation                  | Developmental Subgroup |
|------------------------|--------------------------------|-----------------|-----------------------------------------------------------------------------------------------------------------------------------------------------------------------------------------------|-------|------------------------|-------------------------------|------------------------|
|                        | (Vande Voort et al., 2010)     | Client          | Pre- to post-treatment change in anxiety.                                                                                                                                                     | -     | Unrelated              | Anxiety-related presentations | Youth                  |
|                        | (Vande Voort et al., 2010)     | Client          | Initial anxiety symptoms.                                                                                                                                                                     | -     | Unrelated              | Anxiety-related presentations | Youth                  |
| Behavioural Regulation | (Becker-Haimes et al., 2017)   | Clinician       | Perceived divergence between evidence-based and current practices.                                                                                                                            | -     | Unrelated              | Anxiety-related presentations | Youth                  |
|                        | (Becker-Haimes et al., 2017)   | Clinician       | Willingness to use evidence-based practice if required by organisation, supervisor, or state.                                                                                                 | -     | Negatively related     | Anxiety-related presentations | Youth                  |
| Unclassified           | (Cook et al., 2014)            | Clinician       | Adaptations made to prolonged exposure ranging from tailoring to abandoning principles of the intervention.                                                                                   | -     | Unrelated              | PTSD                          | Adults                 |
|                        | (Cook, Thompson, et al., 2020) | Clinician       | Positive attitudes towards evidence-based practices, including appeal, requirements, openness, and divergence with clinical utility.                                                          | -     | Unrelated              | PTSD                          | Adults                 |
|                        | (Reid et al., 2017)            | Clinician       | Number of perceived potential barriers to exposure therapy implementation (e.g., session length, concern about client reaction, lack of resources, lack of training, ethical considerations). | -     | Negatively related     | OCD                           | Youth                  |
|                        | (Reid et al., 2017)            | Clinician       | Number of perceived potential barriers to exposure therapy implementation (e.g., session length, concern about client reaction, lack of resources, lack of training, ethical considerations). | -     | Negatively related     | Anxiety disorders             | Youth                  |
|                        | (Reid et al., 2017)            | Clinician       | Number of perceived potential barriers to exposure therapy implementation (e.g.,                                                                                                              | -     | Unrelated              | PTSD                          | Youth                  |

| TDF Domains | Study | Construct Focus | Constructs                                                                                                   | Notes | Relationship to ET Use | Presentation | Developmental Subgroup |
|-------------|-------|-----------------|--------------------------------------------------------------------------------------------------------------|-------|------------------------|--------------|------------------------|
|             |       |                 | session length, concern about client reaction, lack of resources, lack of training, ethical considerations). |       |                        |              |                        |

*Note.*

<sup>a</sup> Discrepancies existed between the reported direction of the statistical result and its interpretation, as such the predominant interpretation was considered accurate.
